# Supplementary material
Source: publisher figshare collection journal article supplement (https://gsajournals.figshare.com/articles/dataset/_/12017100)

gene11705:106605067

nuclear factor of activated T-cells%2C cytoplasmic 1-like

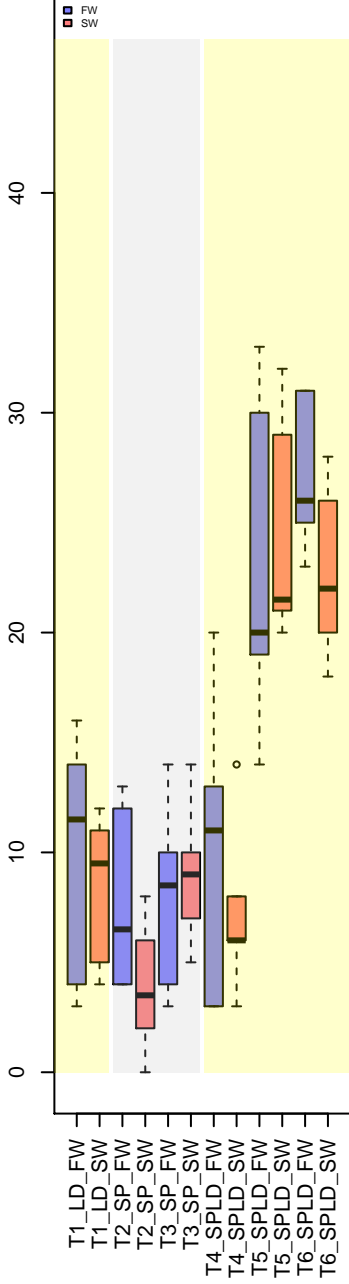

gene11705:106605067

nuclear factor of activated T-cells%2C cytoplasmic 1-like

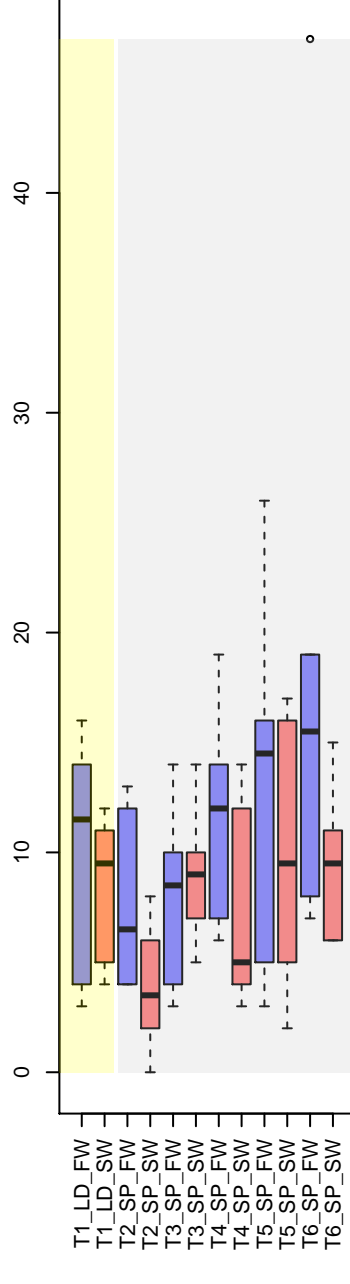

gene11705:106605067

nuclear factor of activated T-cells%2C cytoplasmic 1-like

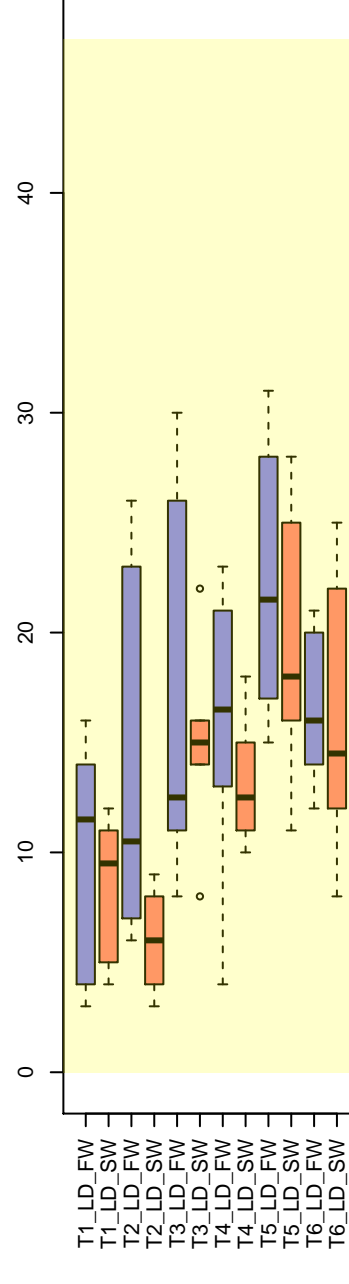

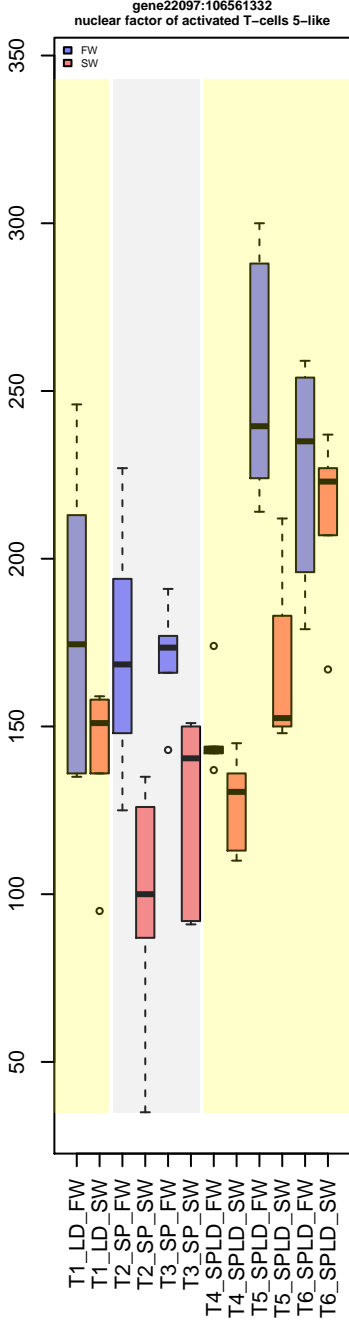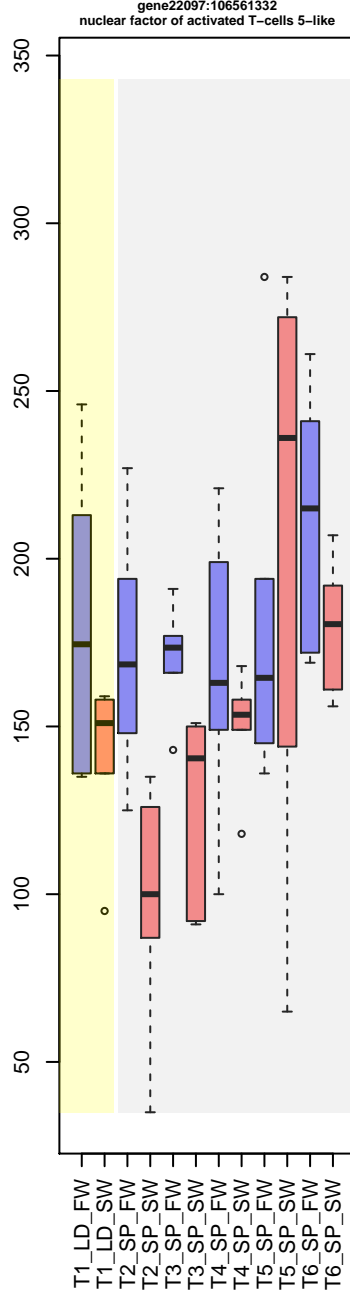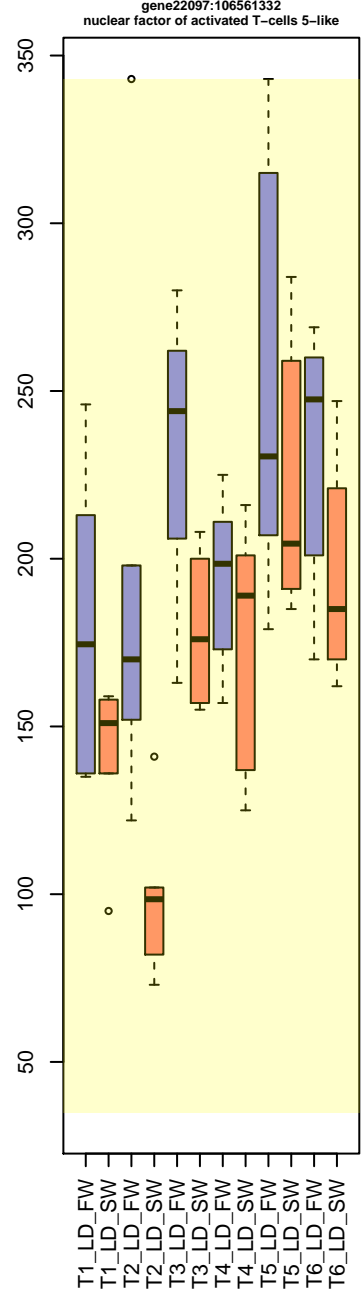

gene22366:106561519

nuclear factor of activated T-cells%2C cytoplasmic 3-like

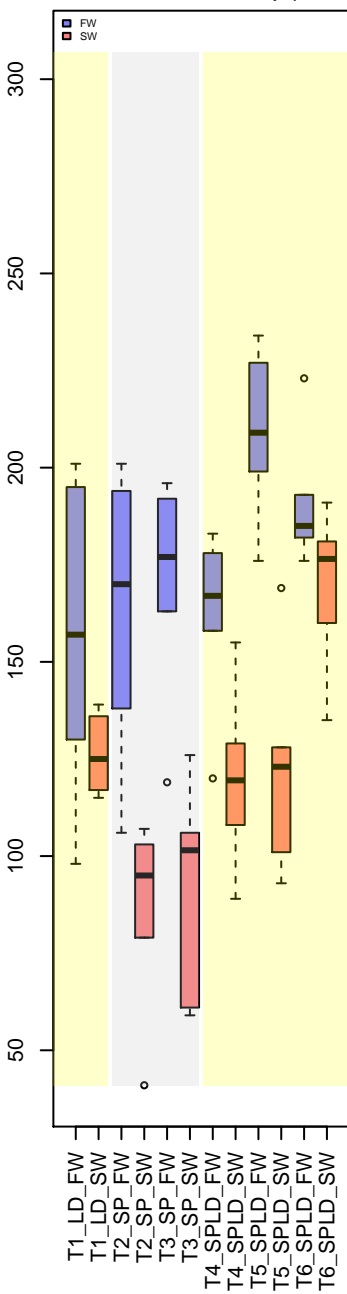

gene22366:106561519

nuclear factor of activated T-cells%2C cytoplasmic 3-like

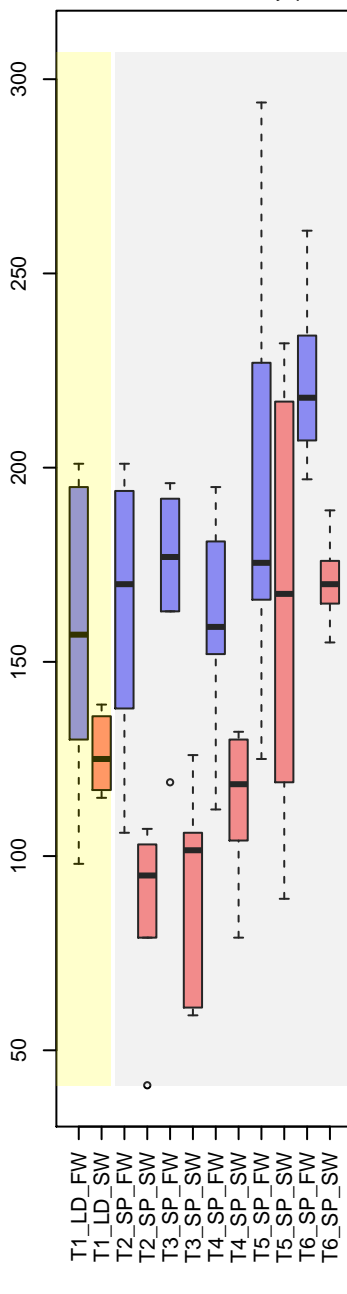

gene22366:106561519

nuclear factor of activated T-cells%2C cytoplasmic 3-like

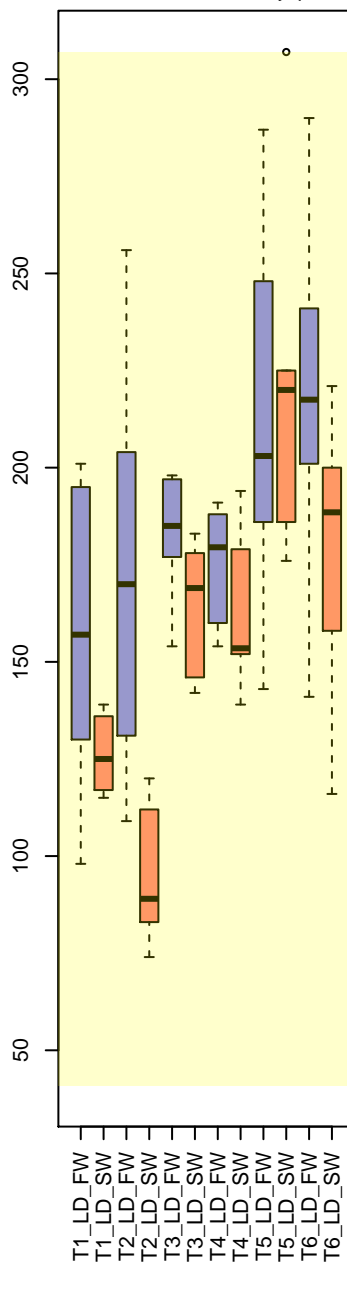

gene22999:106562092  
nuclear factor of activated T-cells 5-like

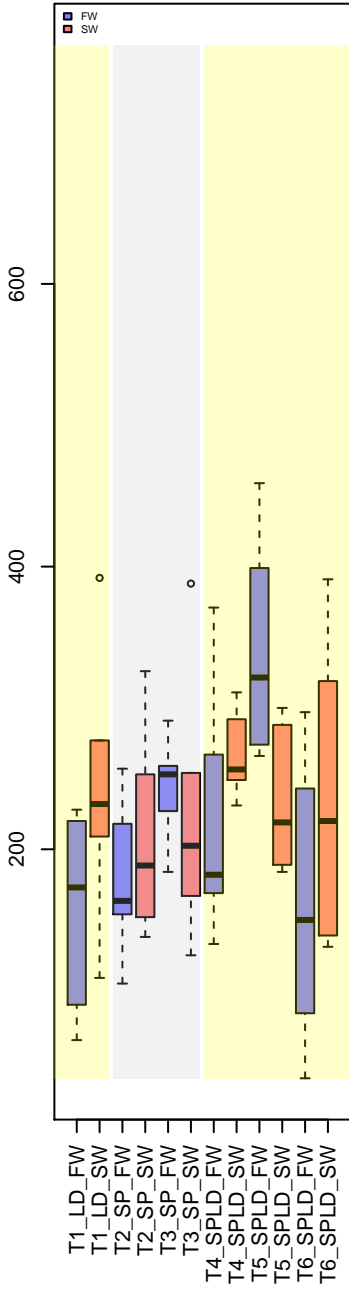

gene22999:106562092  
nuclear factor of activated T-cells 5-like

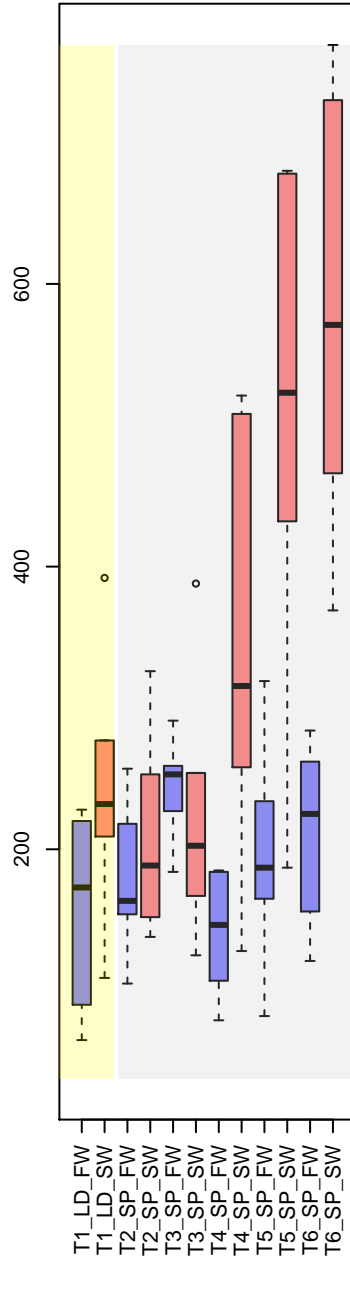

gene22999:106562092  
nuclear factor of activated T-cells 5-like

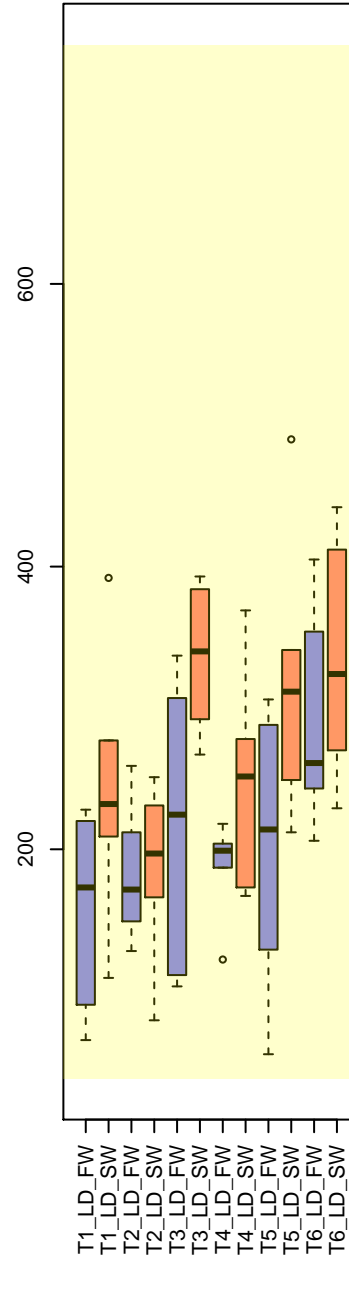

gene23301:106562446

nuclear factor of activated T-cells%2C cytoplasmic 3-like

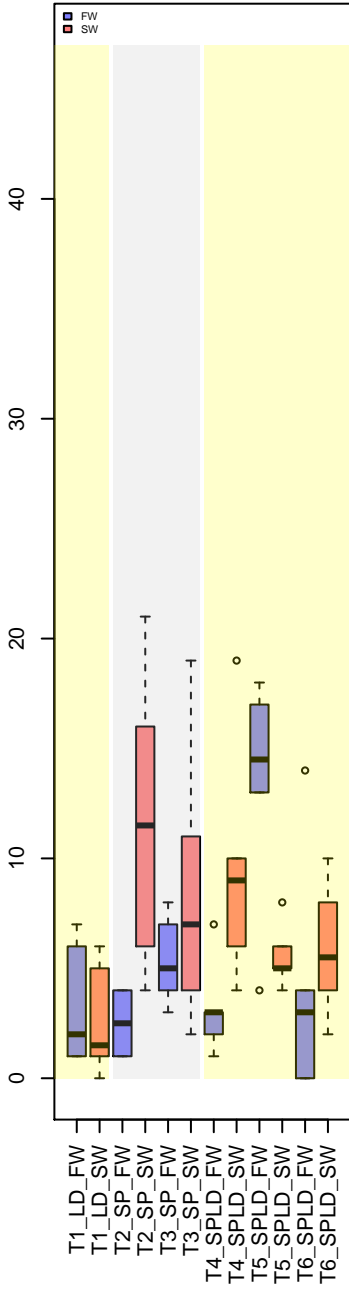

gene23301:106562446

nuclear factor of activated T-cells%2C cytoplasmic 3-like

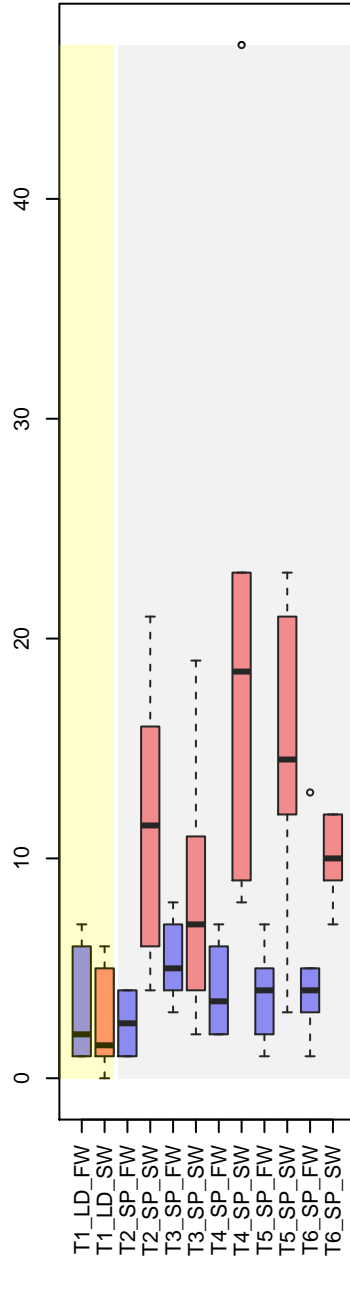

gene23301:106562446

nuclear factor of activated T-cells%2C cytoplasmic 3-like

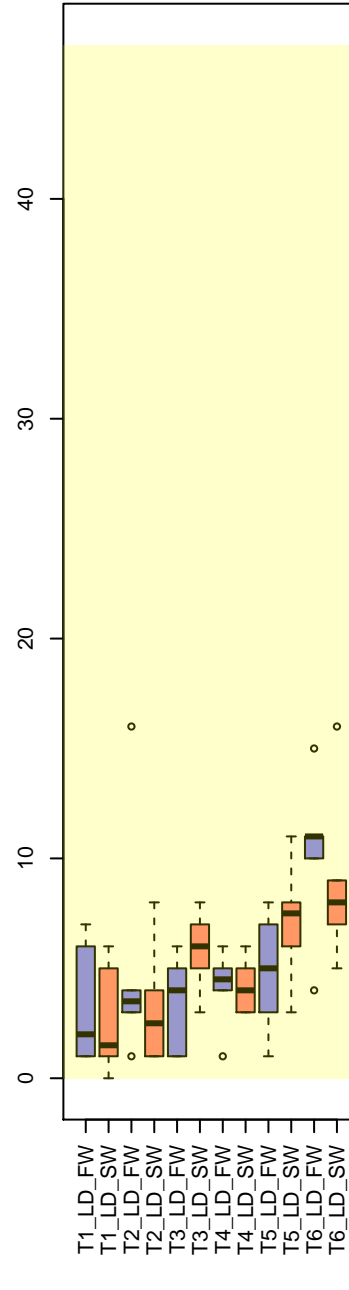

gene28236:106567114

nuclear factor of activated T-cells%2C cytoplasmic 2-like

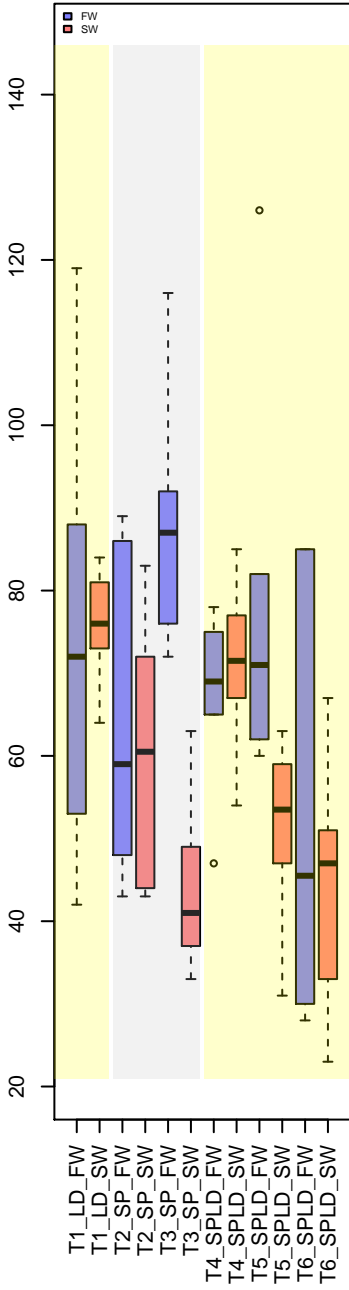

gene28236:106567114

nuclear factor of activated T-cells%2C cytoplasmic 2-like

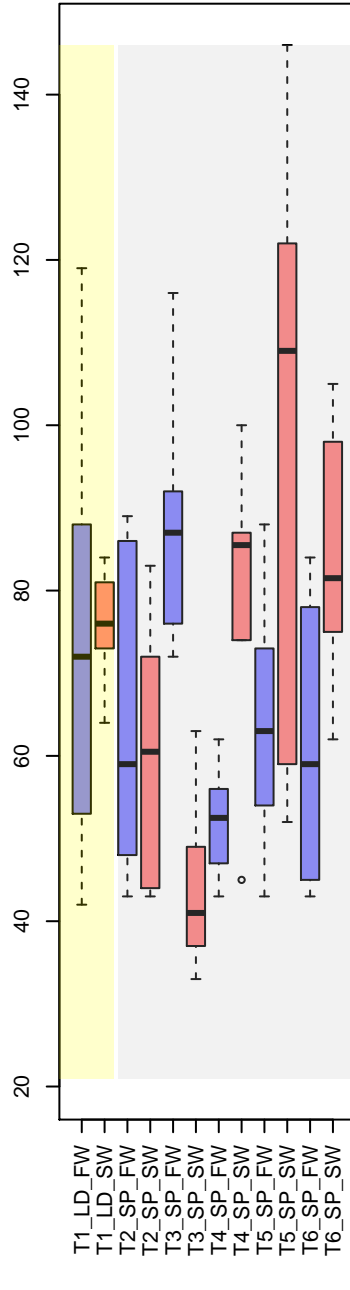

gene28236:106567114

nuclear factor of activated T-cells%2C cytoplasmic 2-like

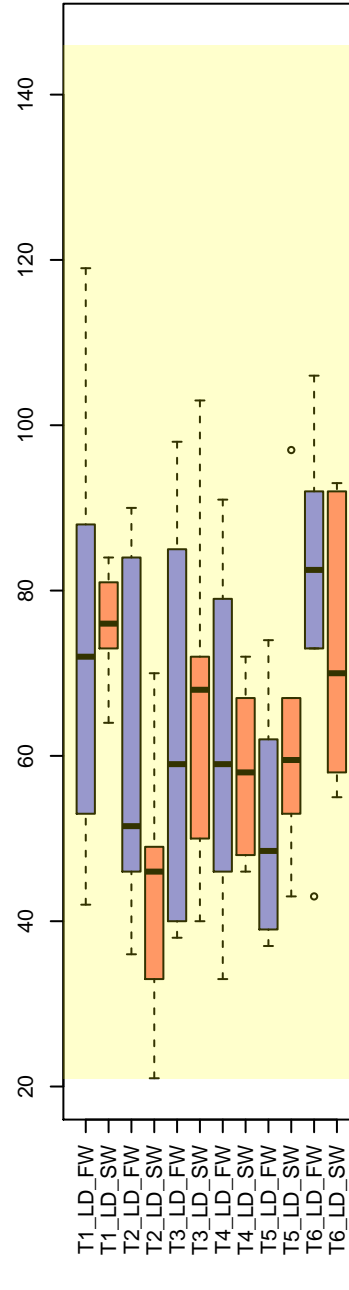

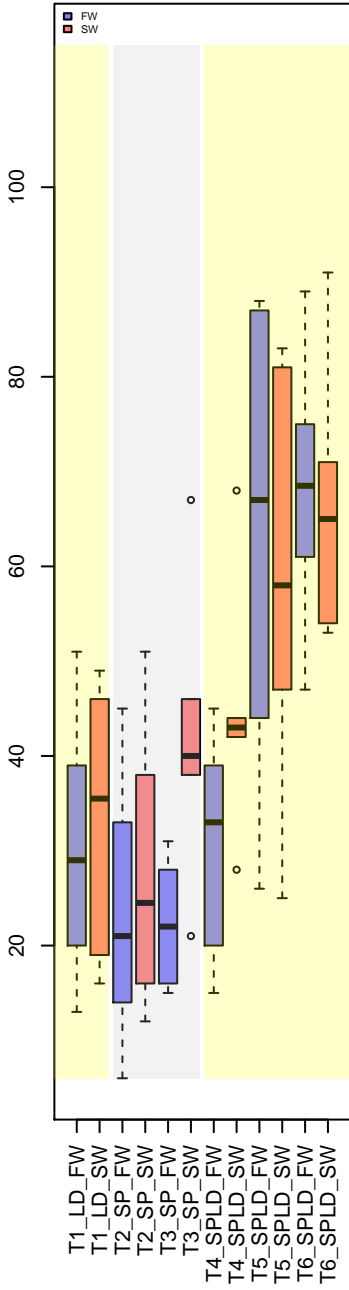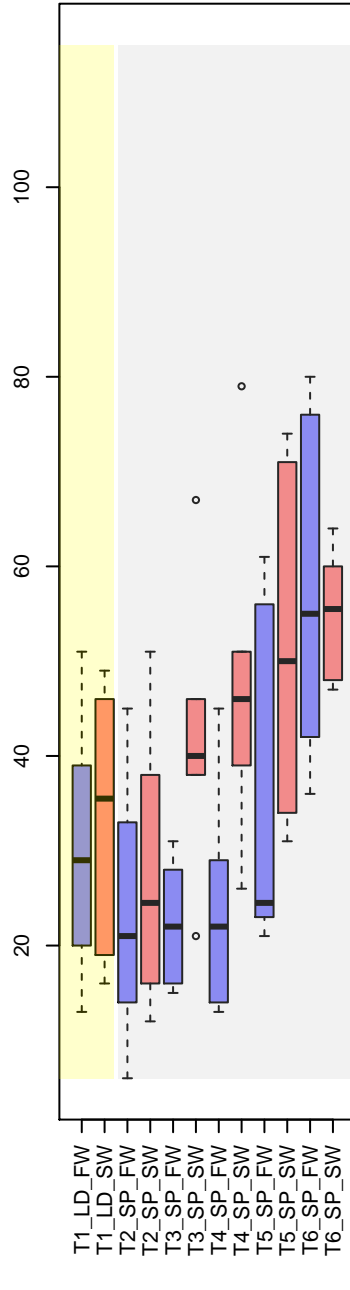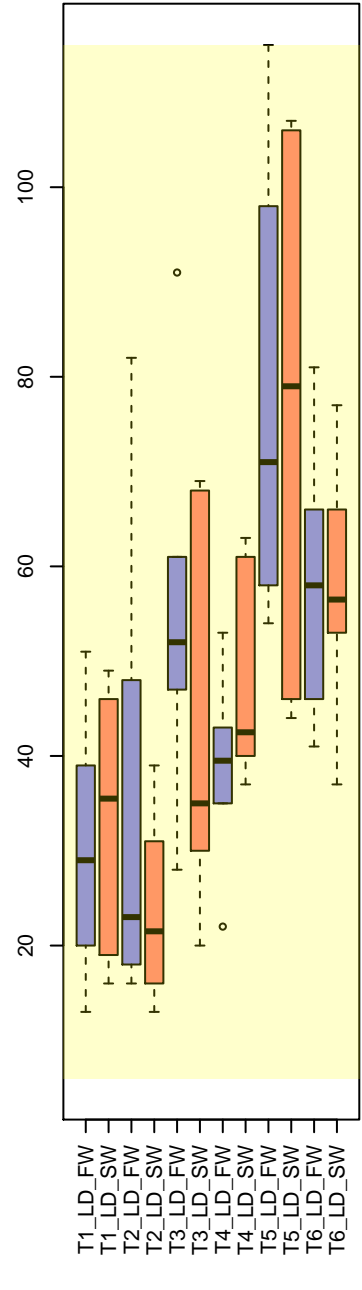

gene30901:106569777

nuclear factor of activated T-cells%2C cytoplasmic 1-like

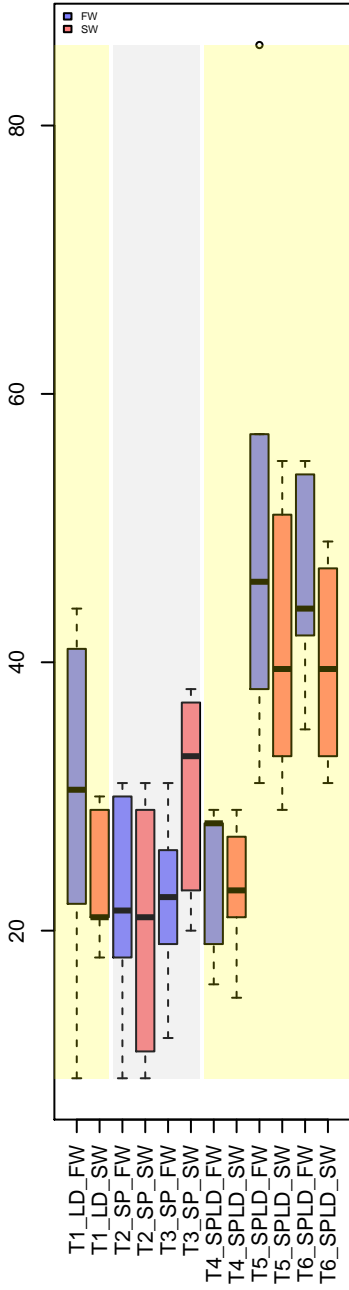

gene30901:106569777

nuclear factor of activated T-cells%2C cytoplasmic 1-like

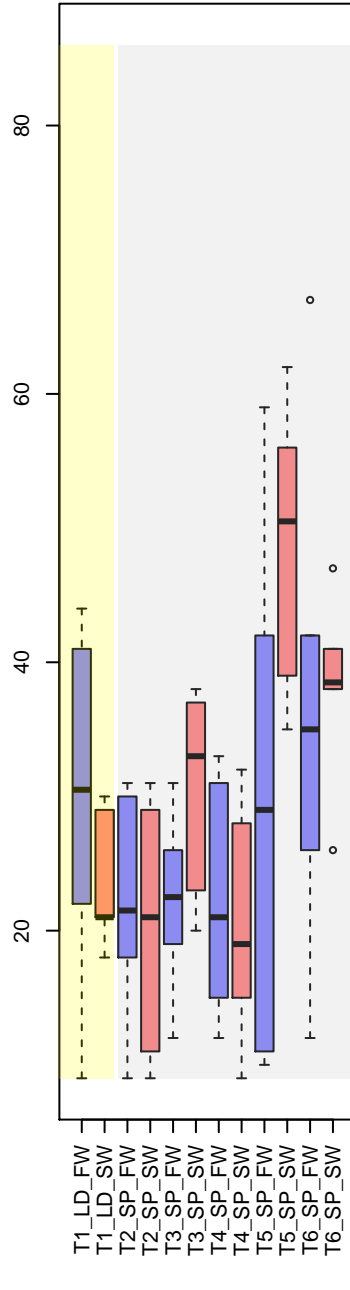

gene30901:106569777

nuclear factor of activated T-cells%2C cytoplasmic 1-like

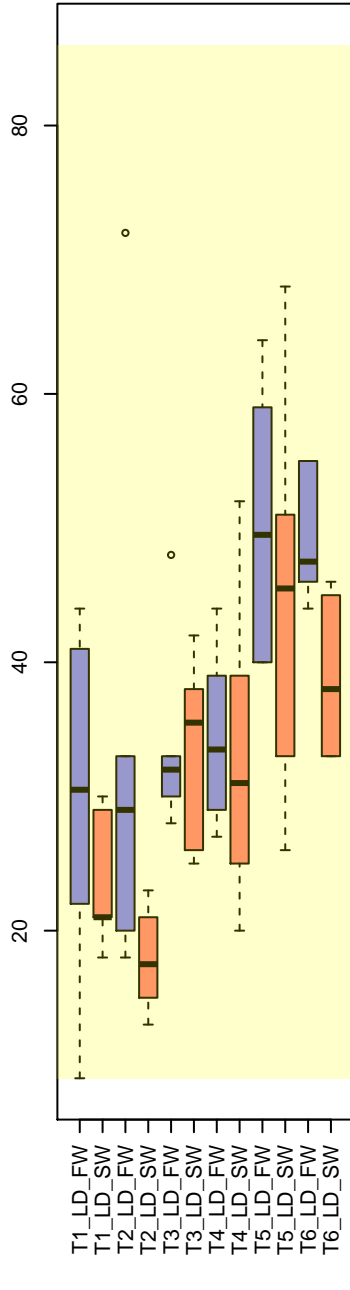



gene33740:106572627

nuclear factor of activated T-cells%2C cytoplasmic 2-like

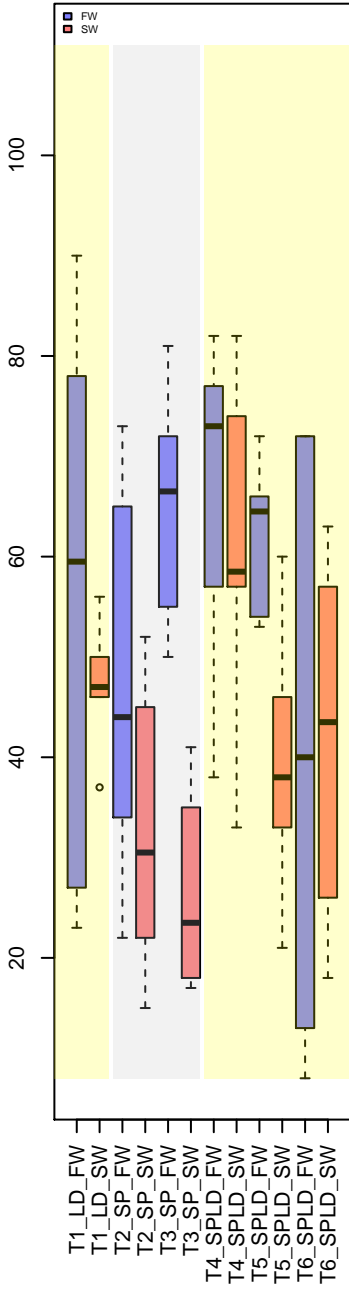

gene33740:106572627

nuclear factor of activated T-cells%2C cytoplasmic 2-like

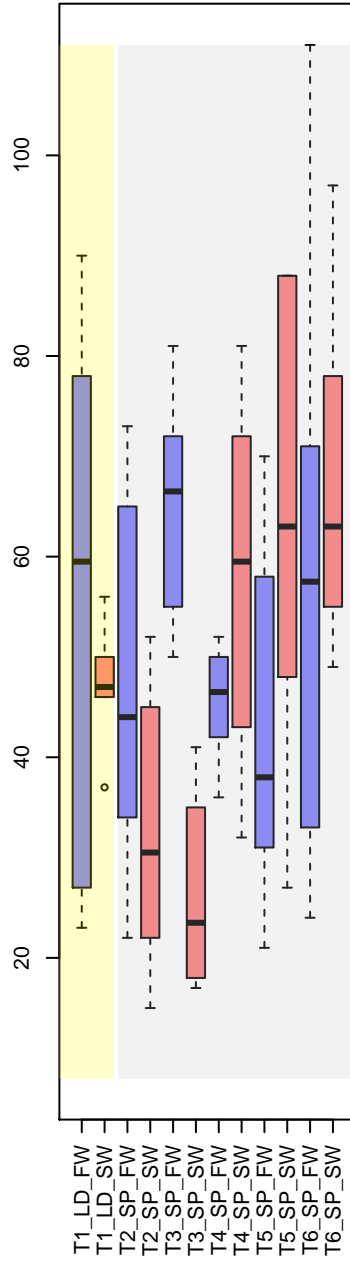

gene33740:106572627

nuclear factor of activated T-cells%2C cytoplasmic 2-like

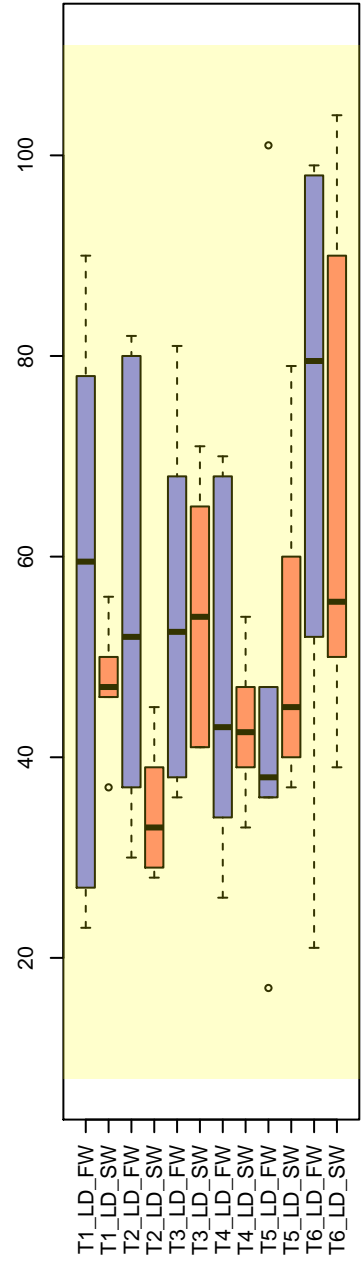

gene34323:106573250

nuclear factor of activated T-cells%2C cytoplasmic 3-like

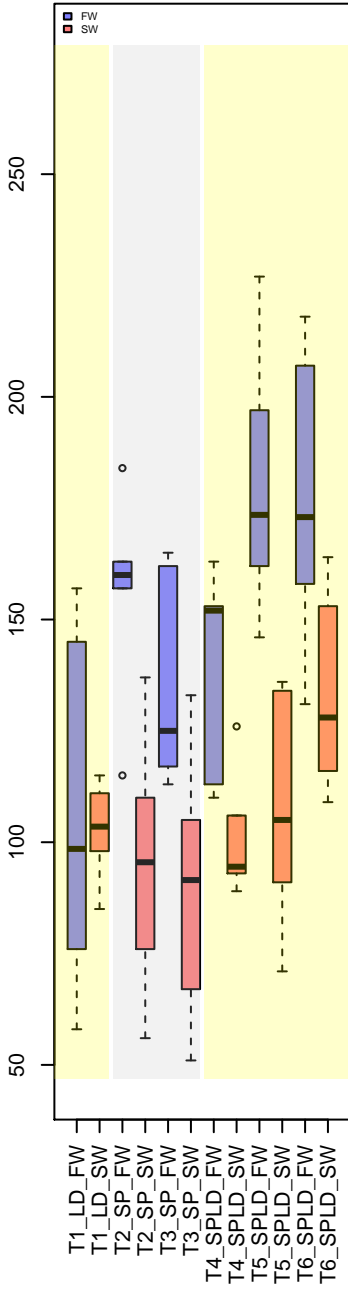

gene34323:106573250

nuclear factor of activated T-cells%2C cytoplasmic 3-like

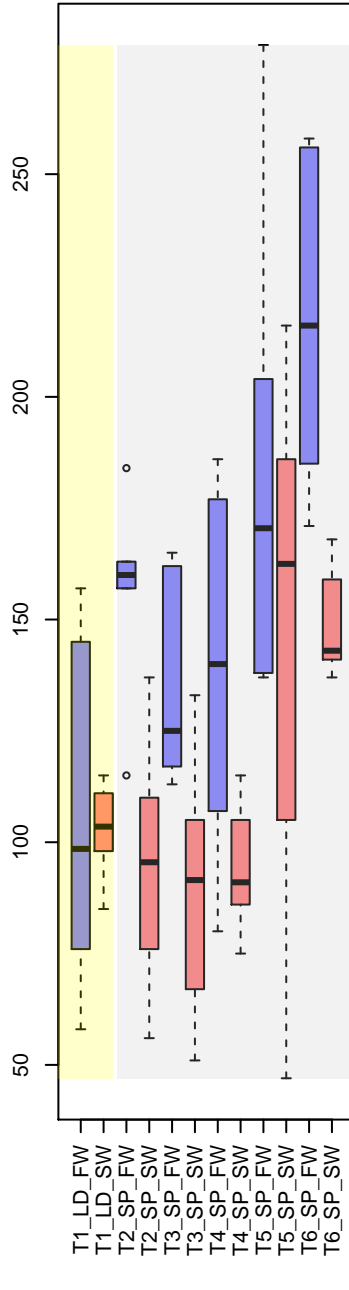

gene34323:106573250

nuclear factor of activated T-cells%2C cytoplasmic 3-like

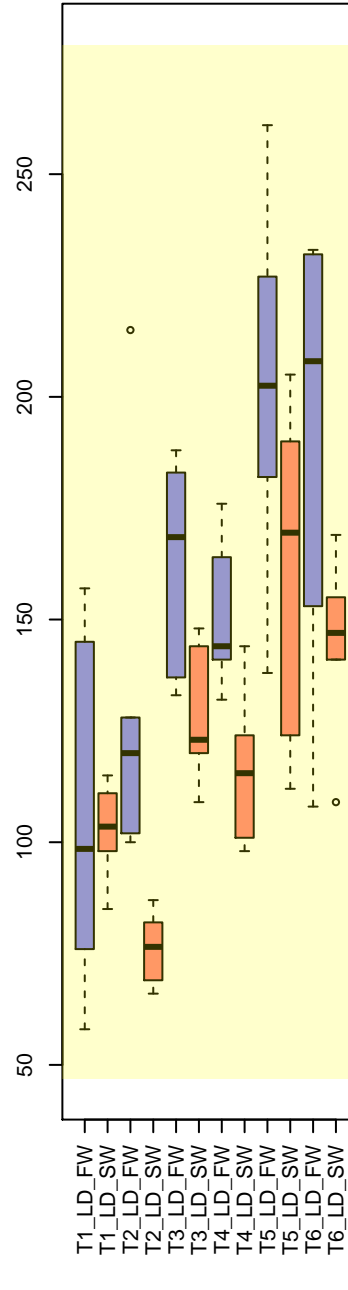

gene34527:106573386

nuclear factor of activated T-cells 5-like

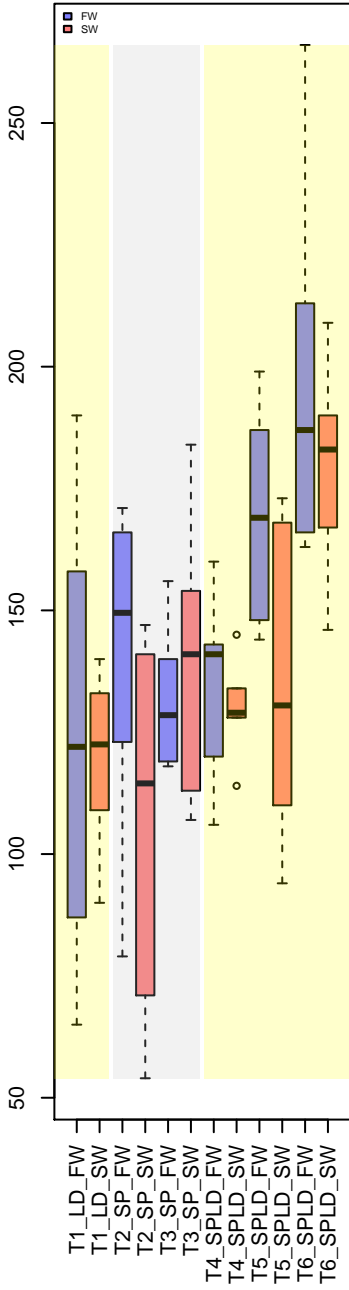

gene34527:106573386

nuclear factor of activated T-cells 5-like

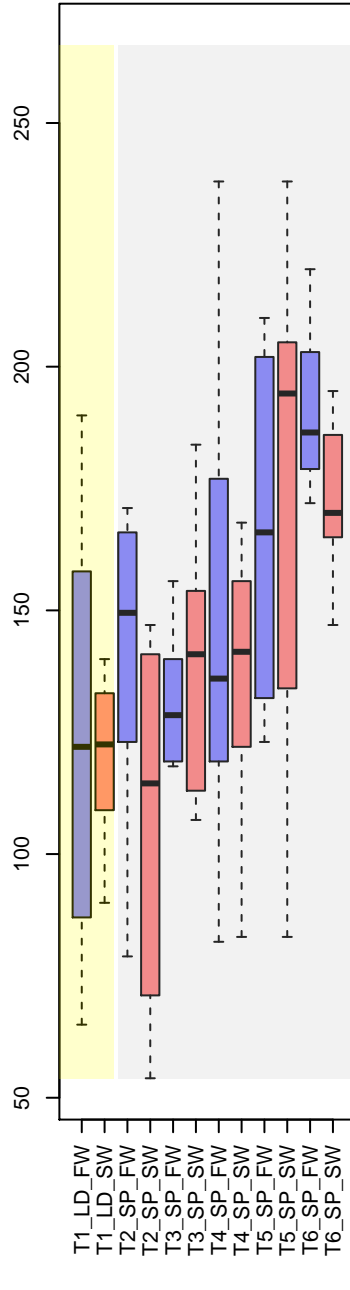

gene34527:106573386

nuclear factor of activated T-cells 5-like

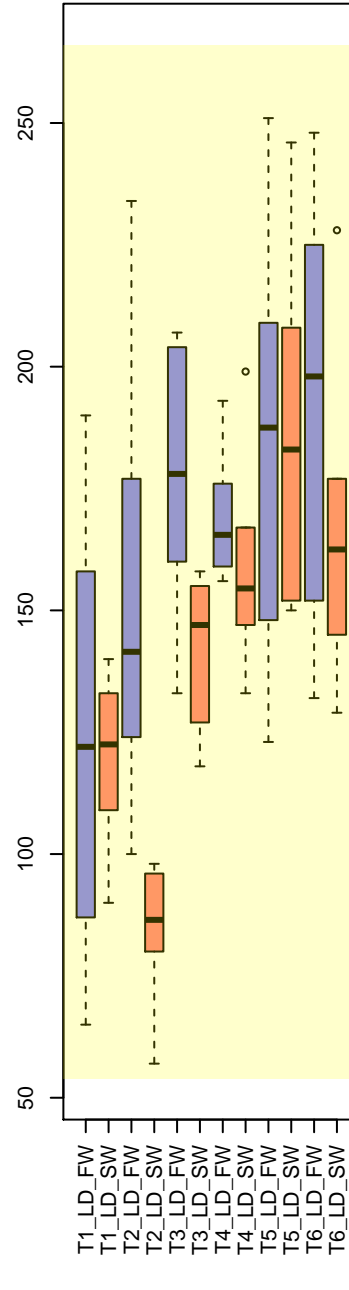

gene4341:106583607

nuclear factor of activated T-cells%2C cytoplasmic 1-like

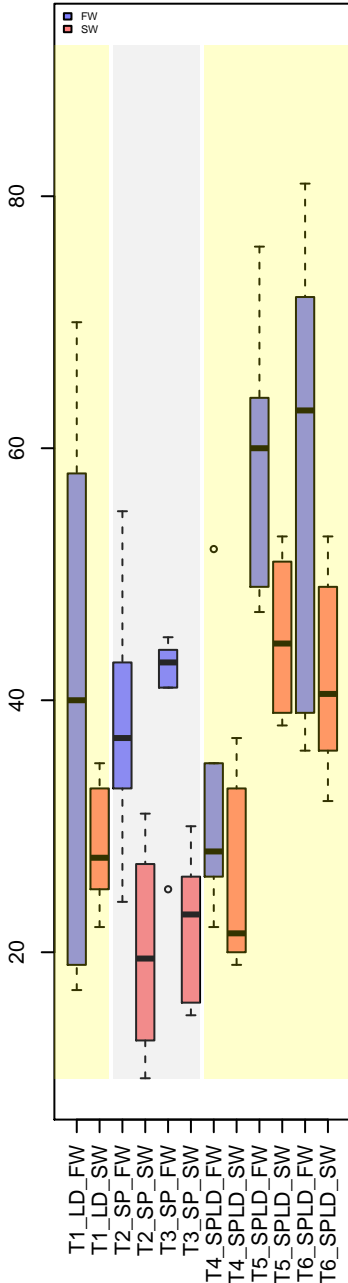

gene4341:106583607

nuclear factor of activated T-cells%2C cytoplasmic 1-like

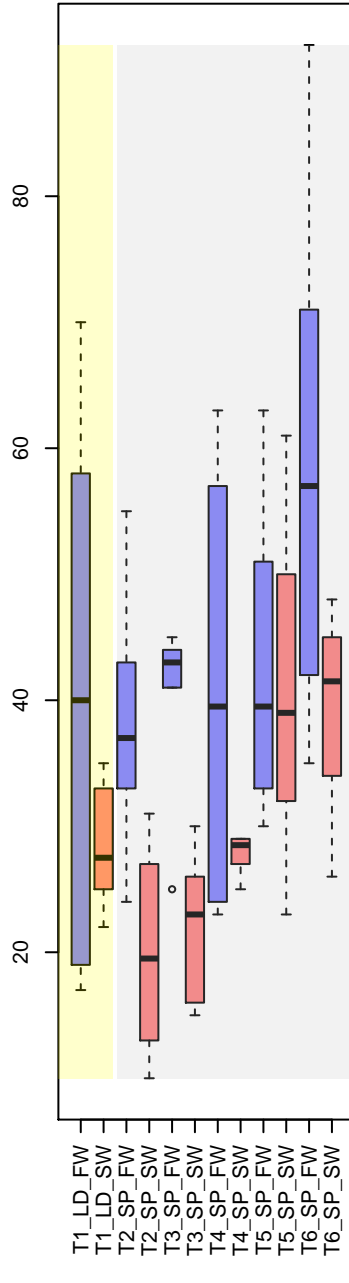

gene4341:106583607

nuclear factor of activated T-cells%2C cytoplasmic 1-like

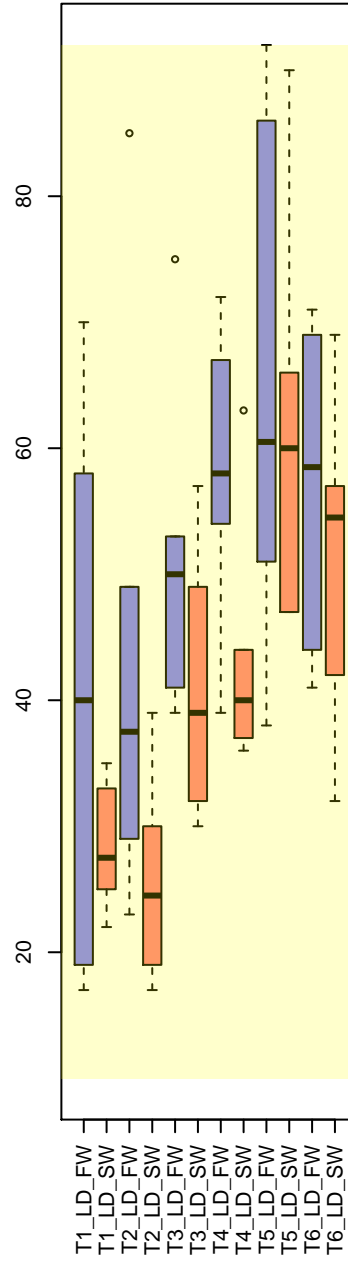

gene44880:106583670

nuclear factor of activated T-cells%2C cytoplasmic 2-like

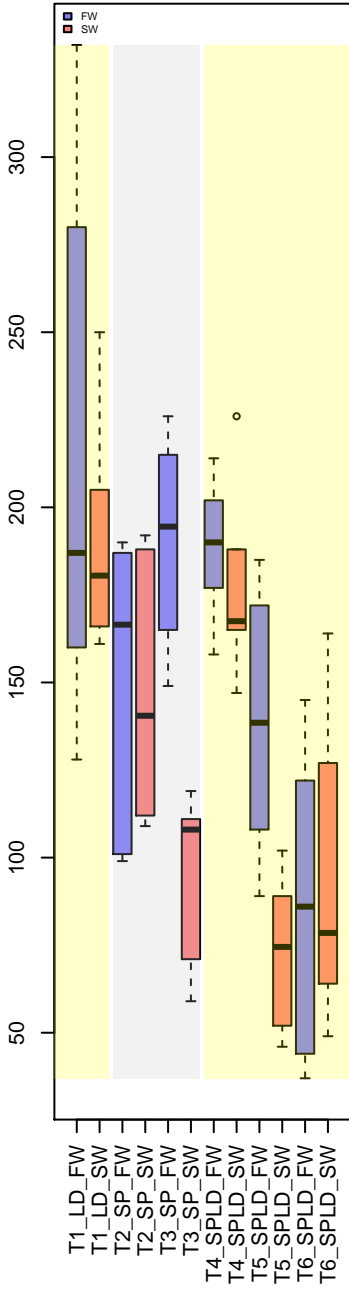

gene44880:106583670

nuclear factor of activated T-cells%2C cytoplasmic 2-like

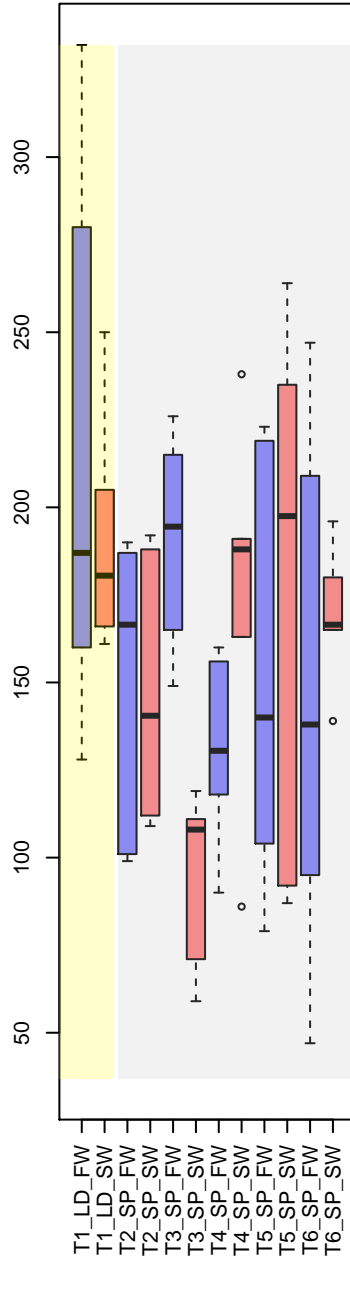

gene44880:106583670

nuclear factor of activated T-cells%2C cytoplasmic 2-like

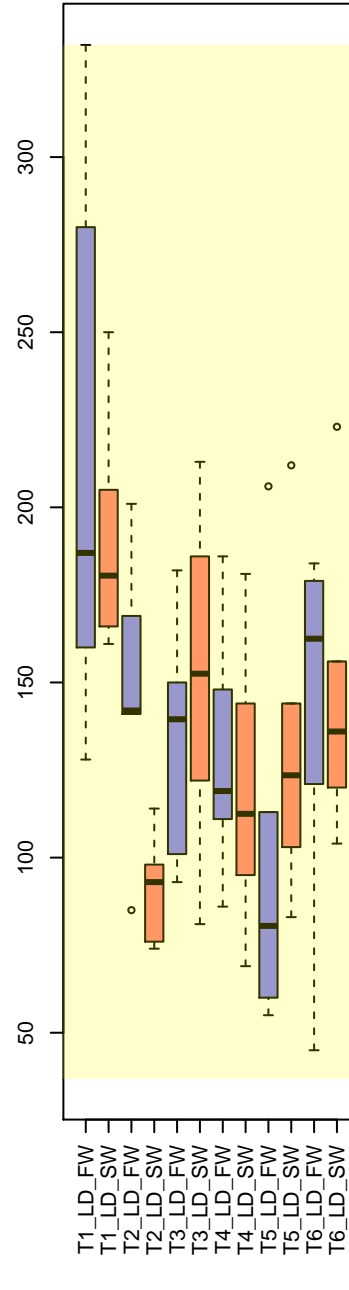

gene48548:106587185  
nuclear factor of activated T-cells 5-like

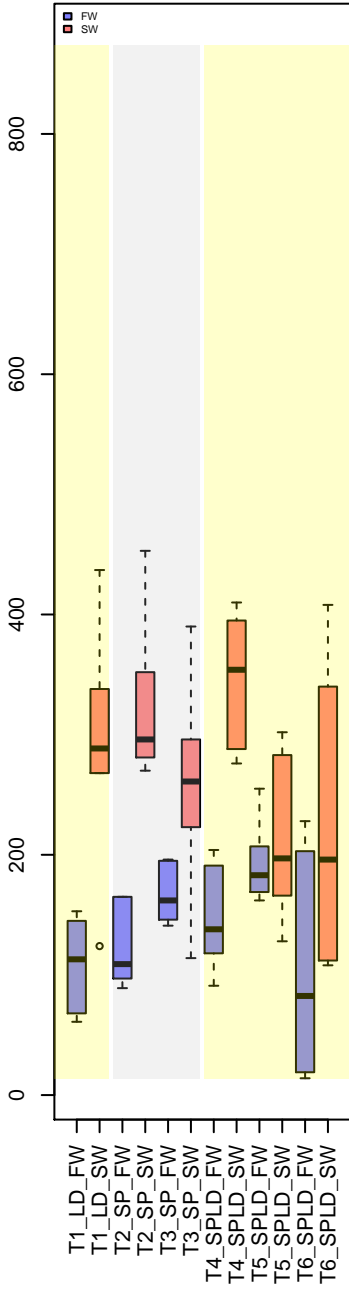

gene48548:106587185  
nuclear factor of activated T-cells 5-like

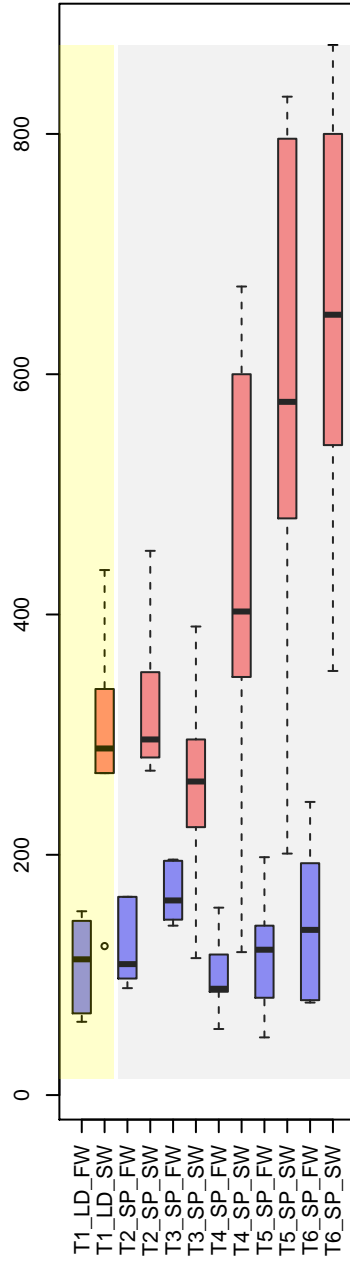

gene48548:106587185  
nuclear factor of activated T-cells 5-like

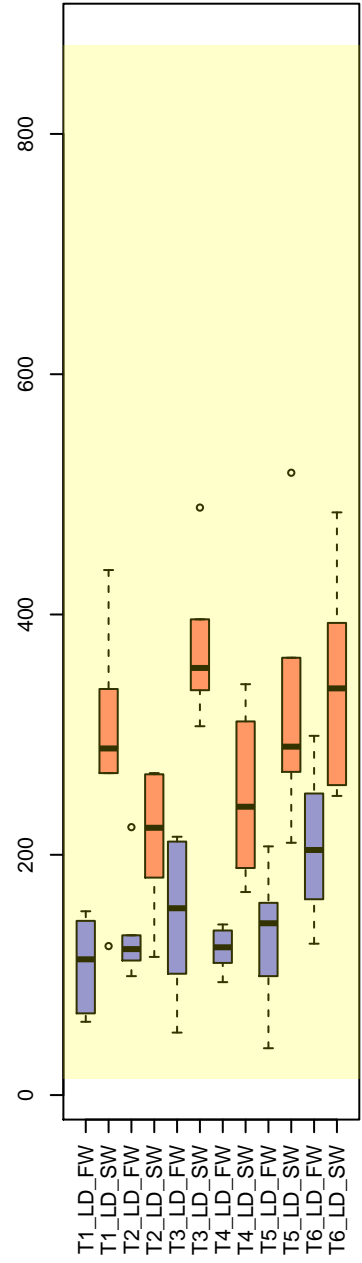

gene48856:106587624

nuclear factor of activated T-cells%2C cytoplasmic 3-like

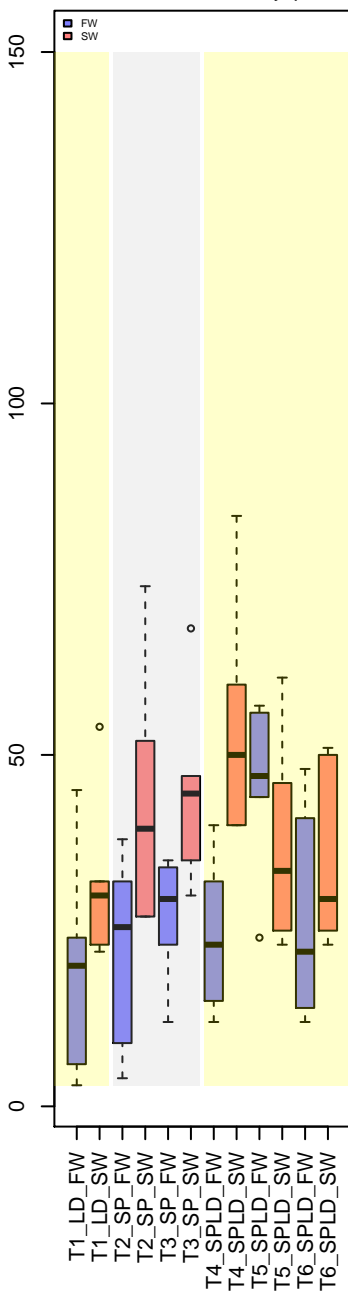

gene48856:106587624

nuclear factor of activated T-cells%2C cytoplasmic 3-like

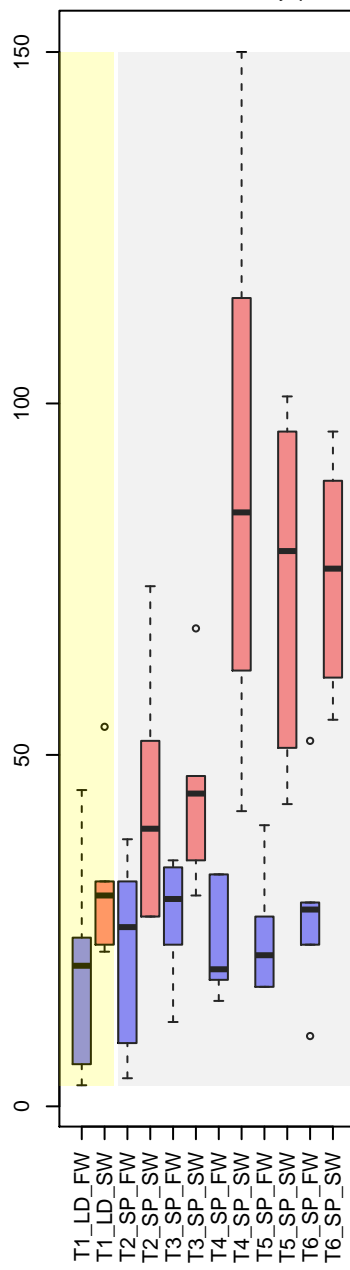

gene48856:106587624

nuclear factor of activated T-cells%2C cytoplasmic 3-like

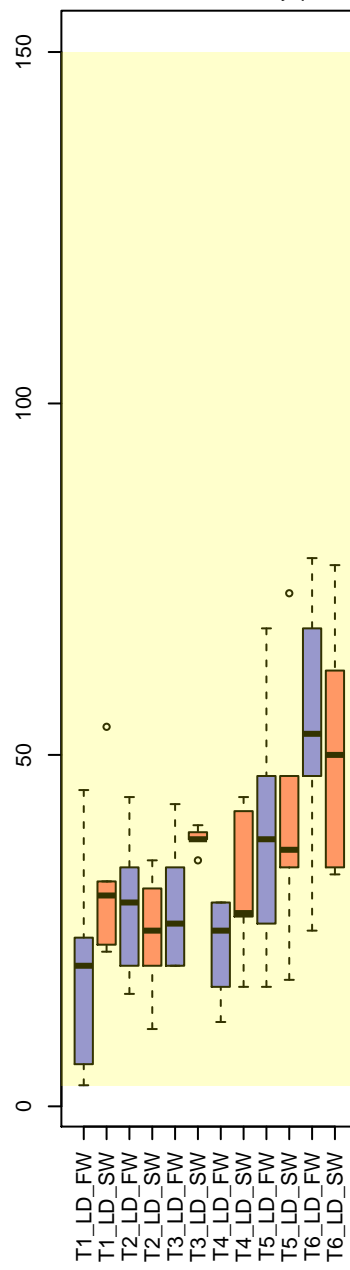

gene49689:106588230

nuclear factor of activated T-cells%2C cytoplasmic 1-like

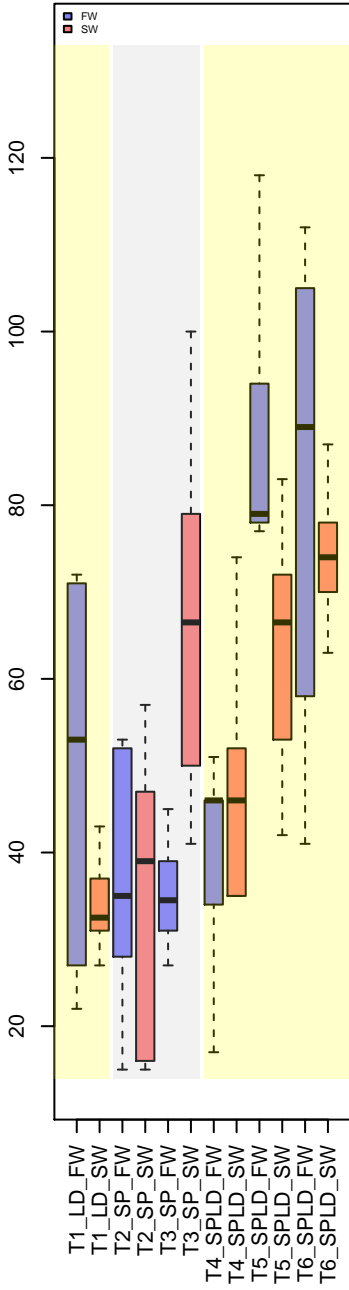

gene49689:106588230

nuclear factor of activated T-cells%2C cytoplasmic 1-like

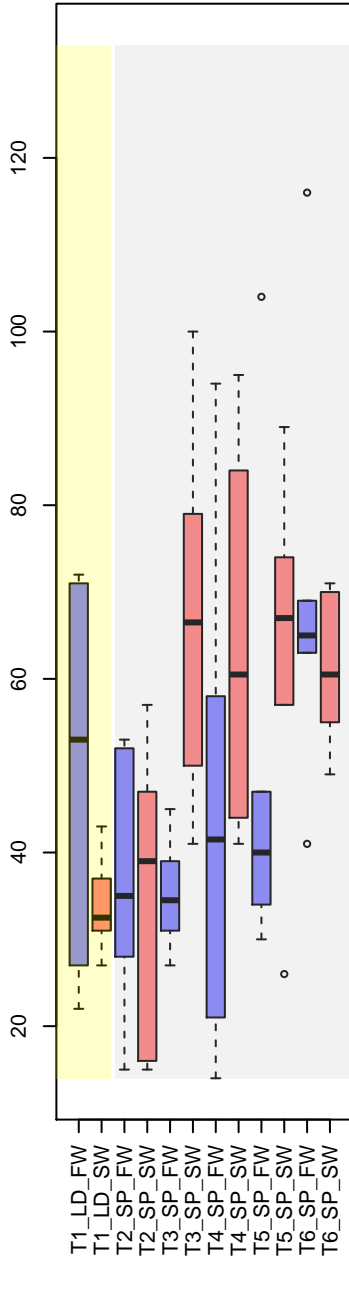

gene49689:106588230

nuclear factor of activated T-cells%2C cytoplasmic 1-like

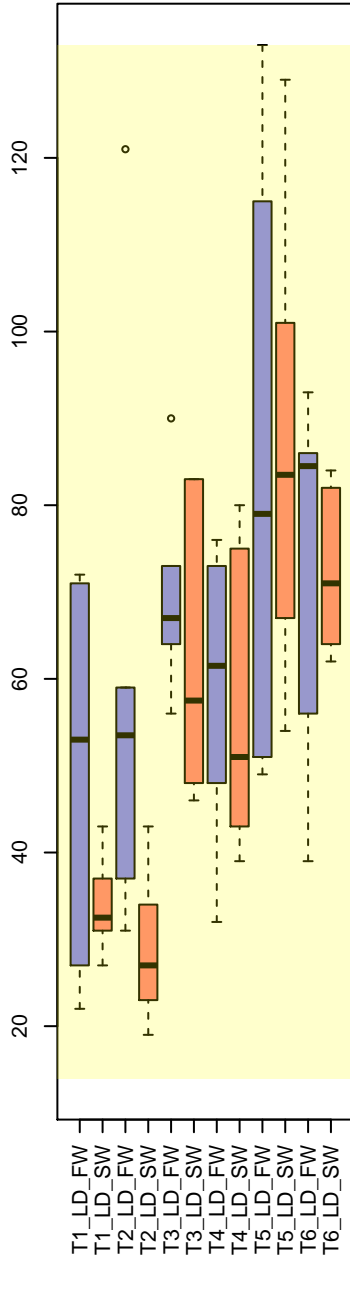



gene6666:106600383

nuclear factor of activated T-cells%2C cytoplasmic 4-like

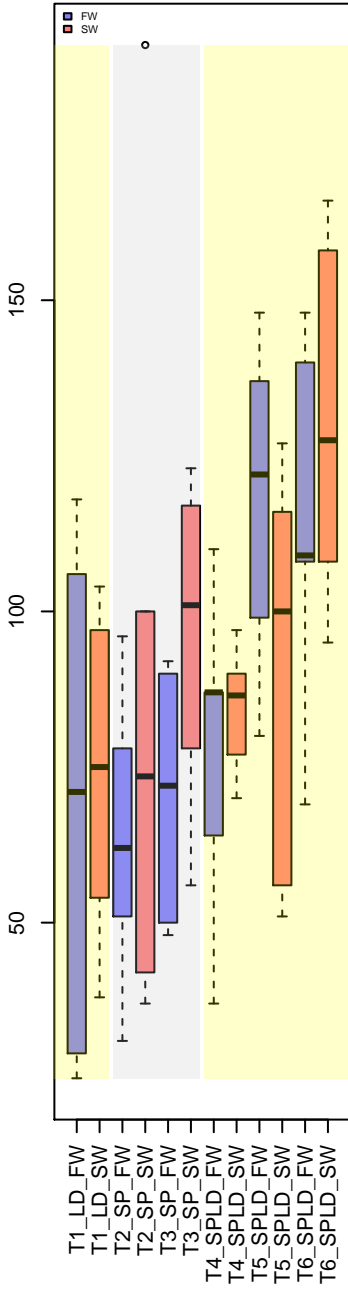

gene6666:106600383

nuclear factor of activated T-cells%2C cytoplasmic 4-like

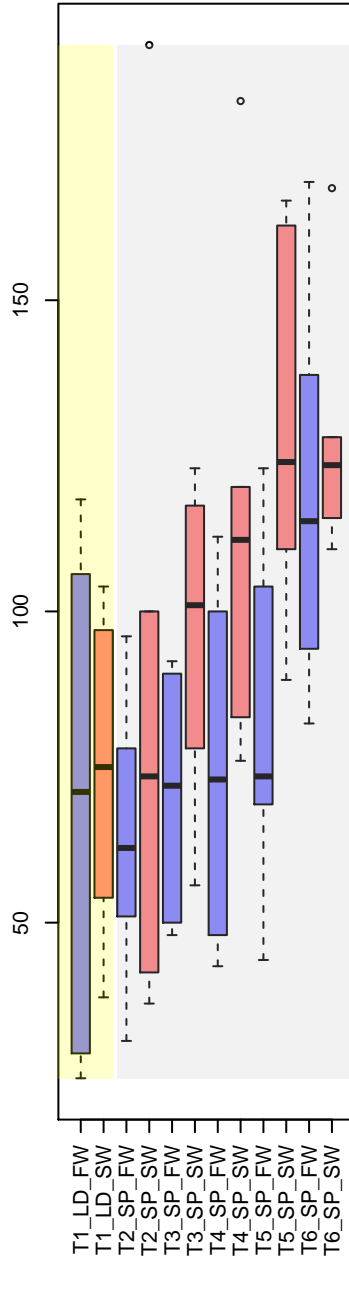

gene6666:106600383

nuclear factor of activated T-cells%2C cytoplasmic 4-like

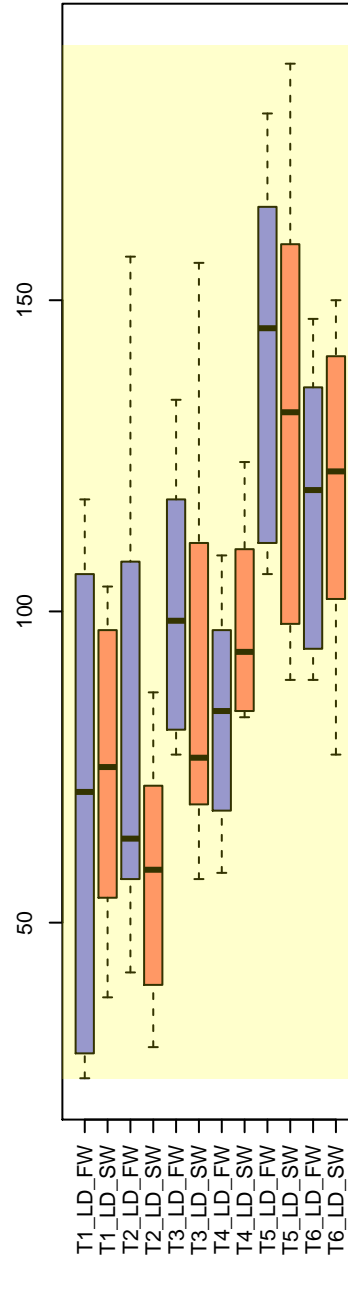

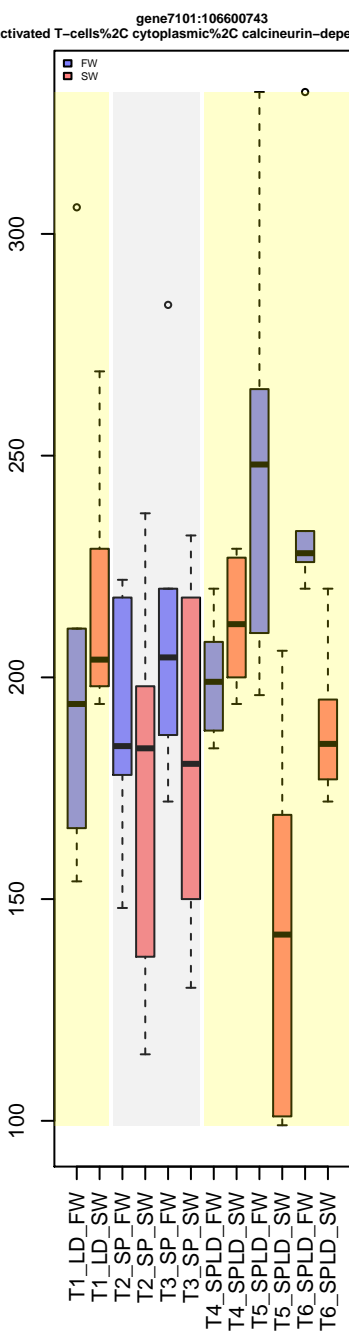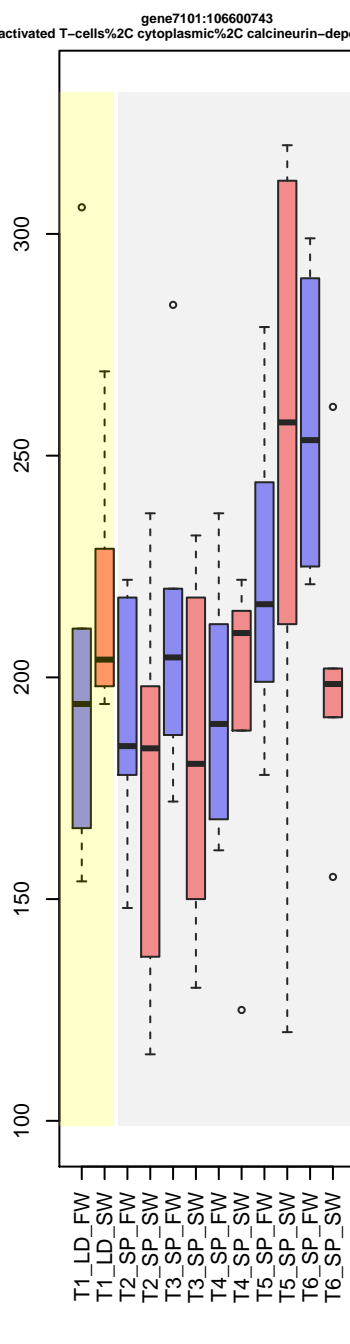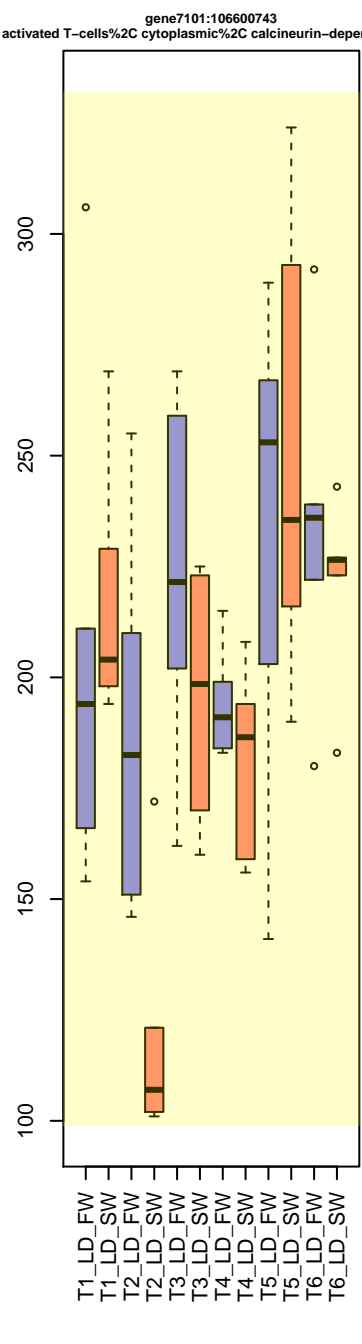

Supplement: Supplementary file 3 [file 1]
