# Supplementary material
Source: publisher figshare collection journal article supplement (https://gsajournals.figshare.com/articles/dataset/_/12017100)

# T4 Biological process

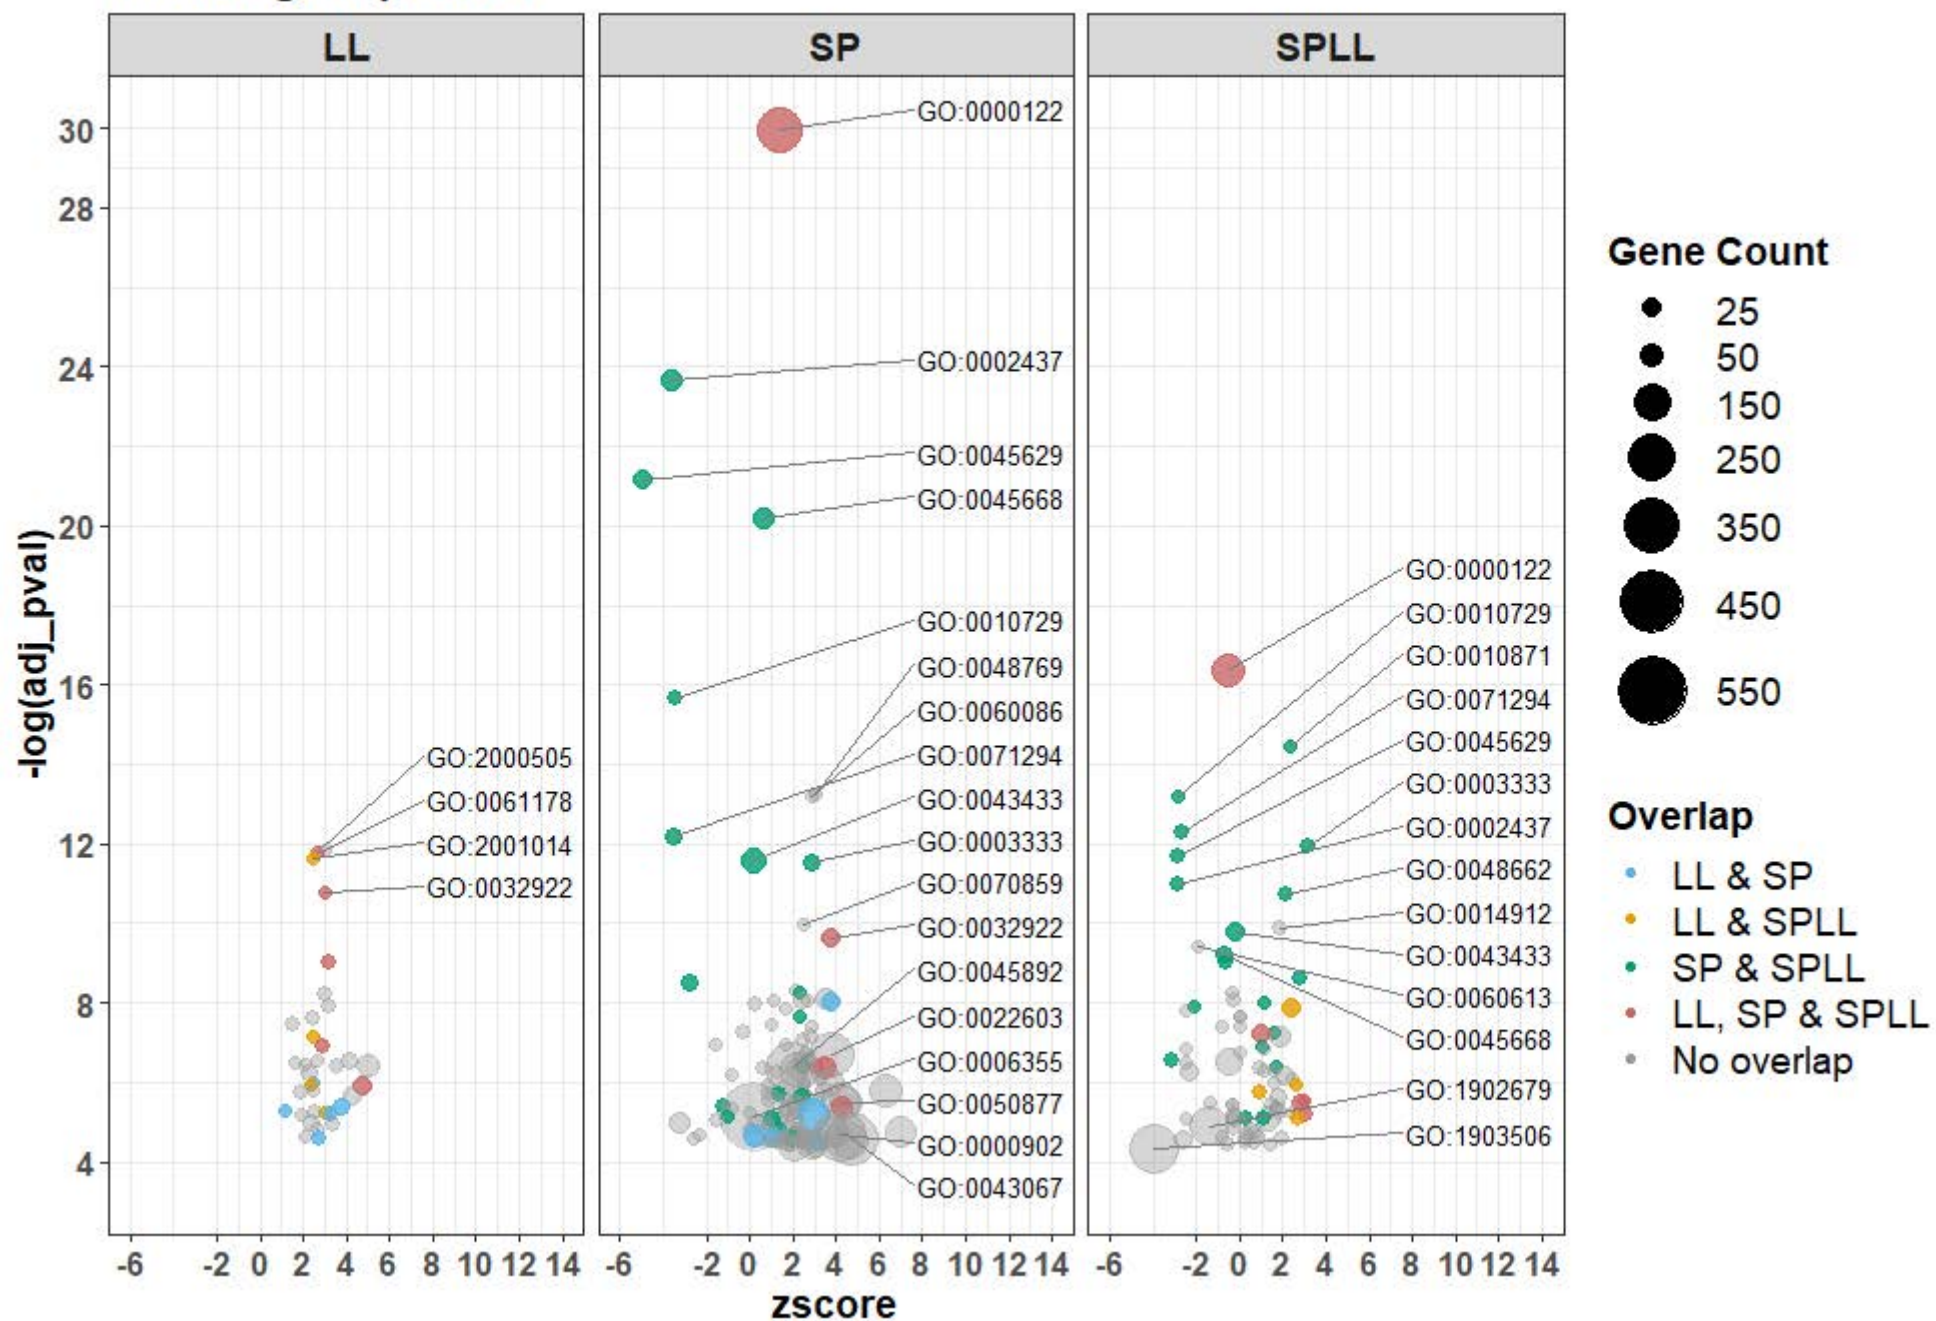

# T4 Cellular component

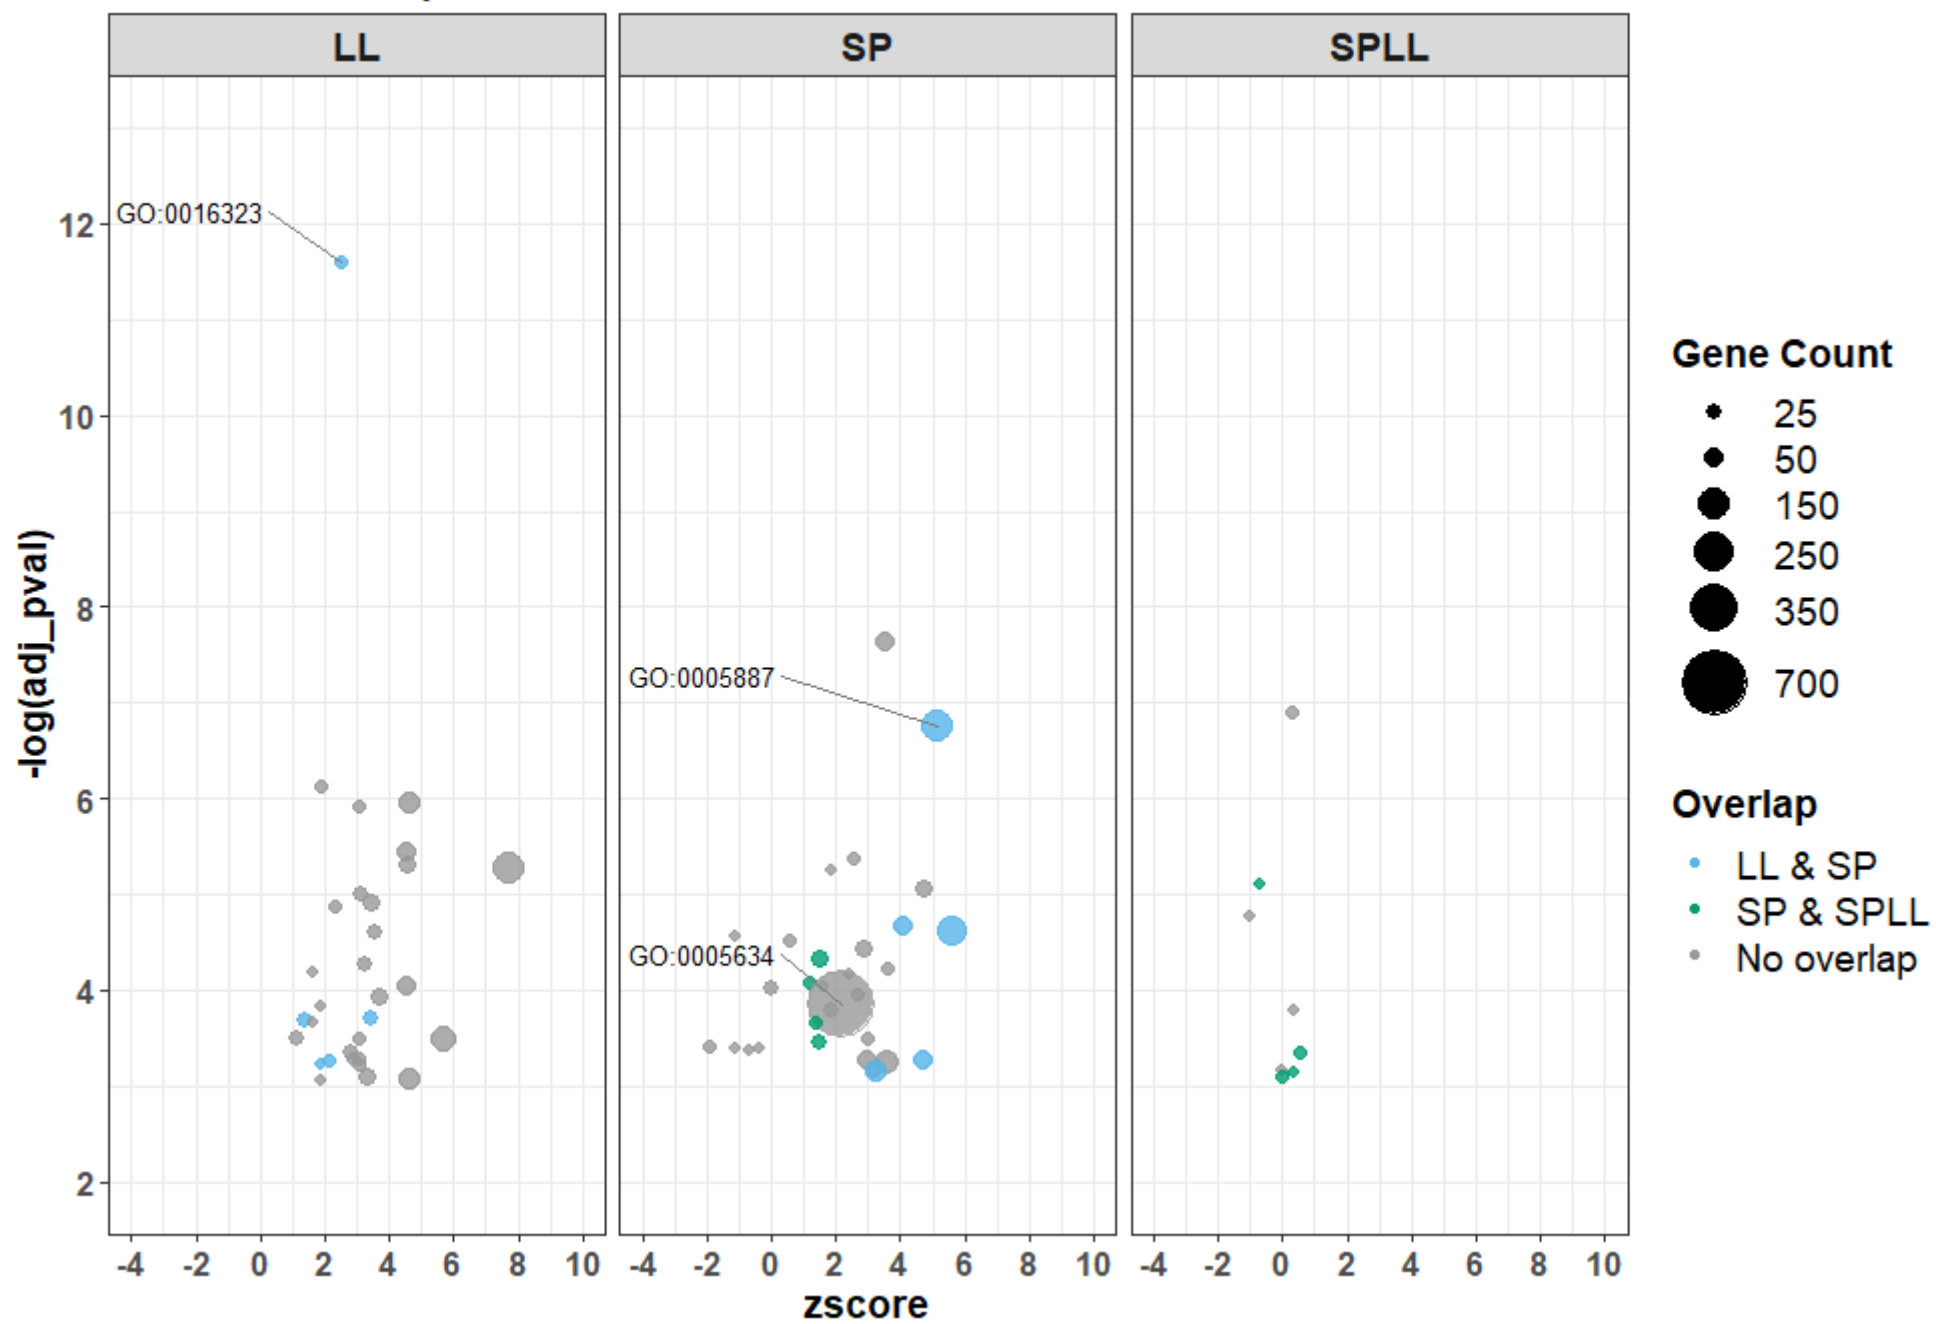

# T4 Molecular function

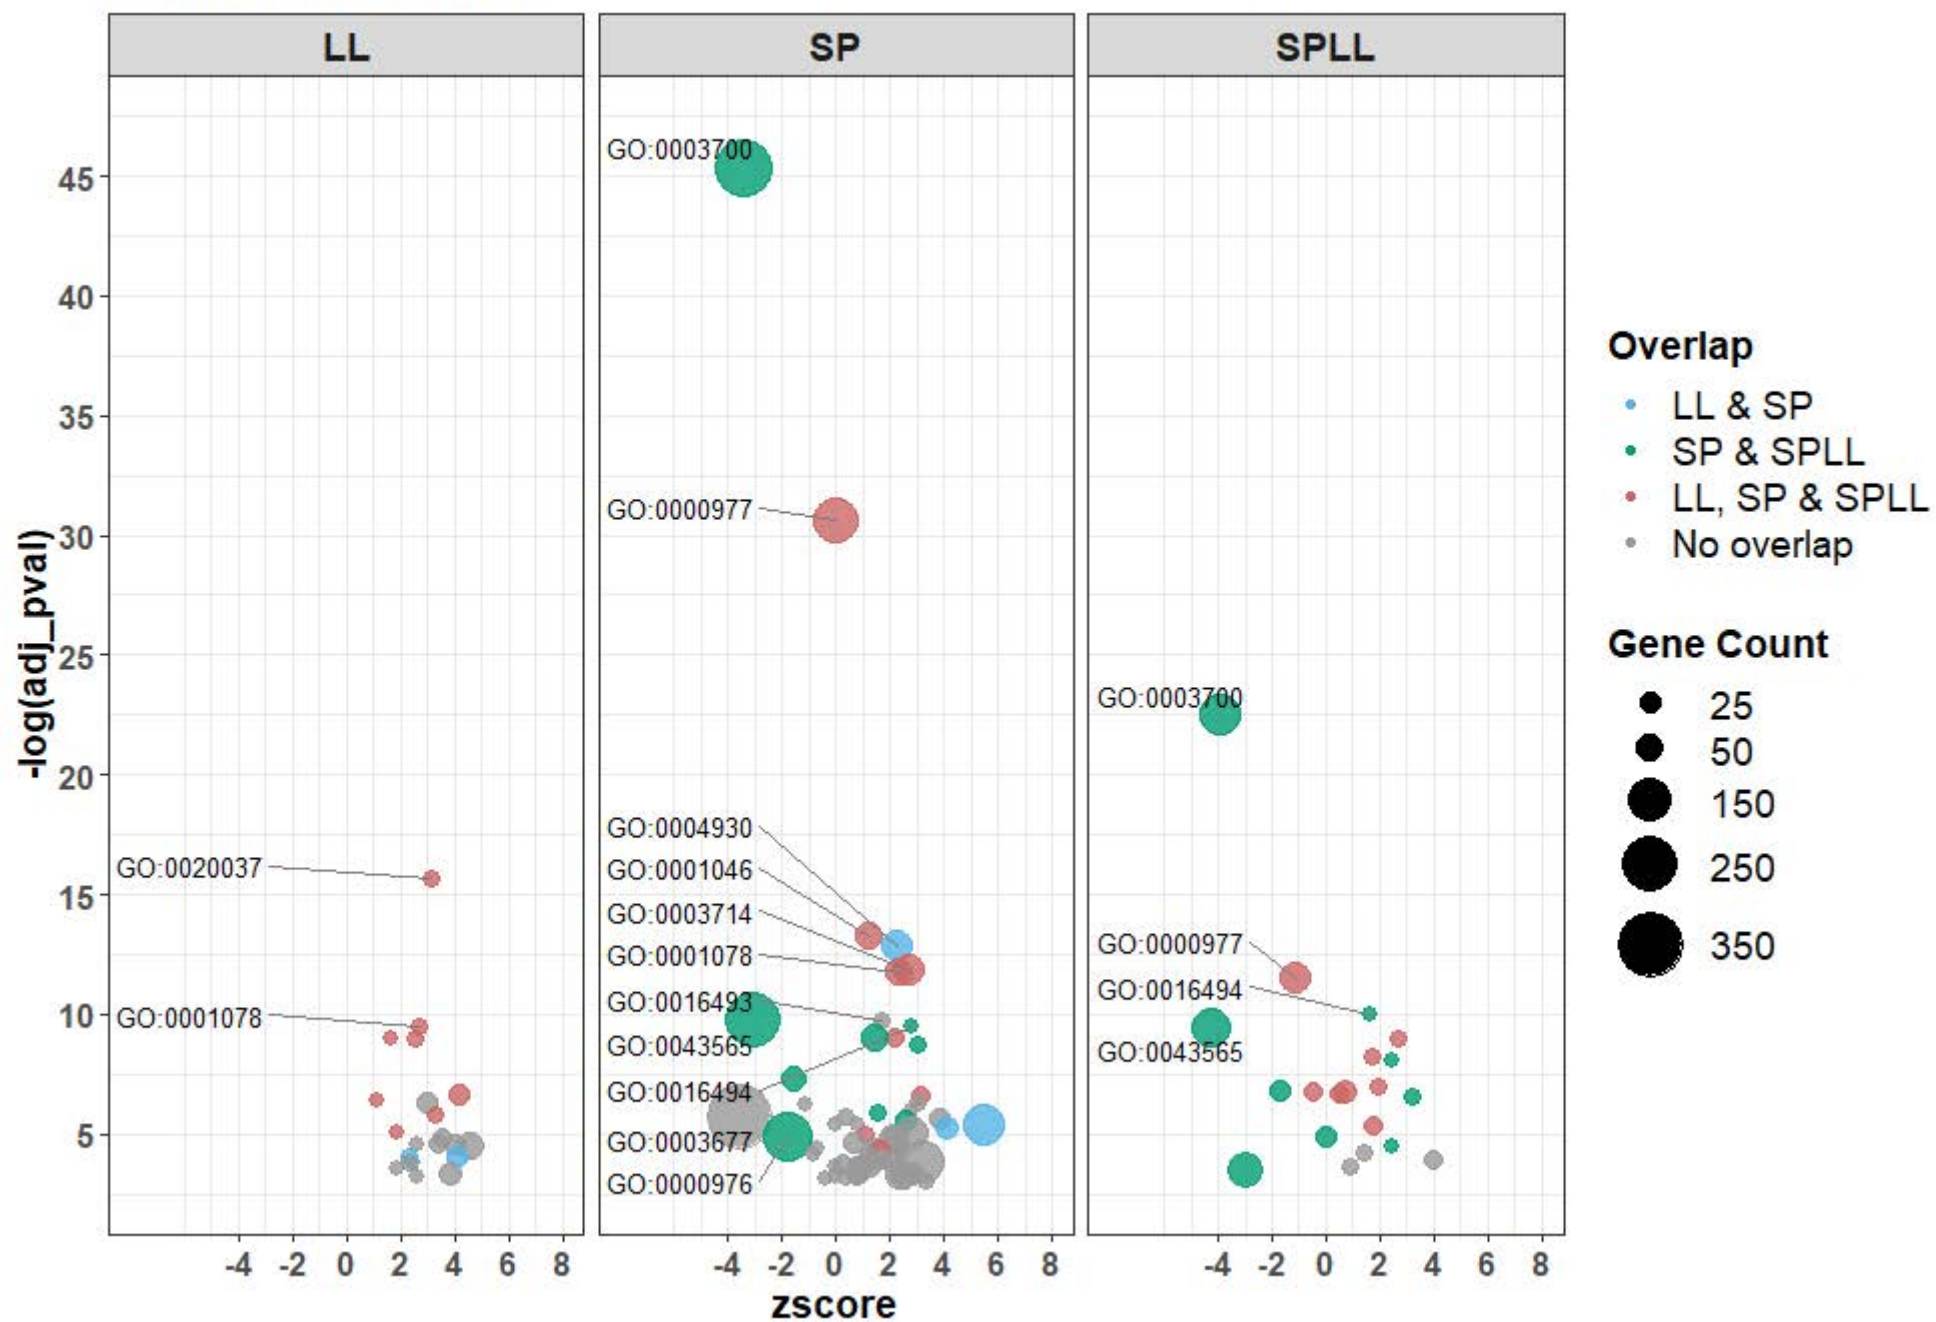

# T5 Biological process

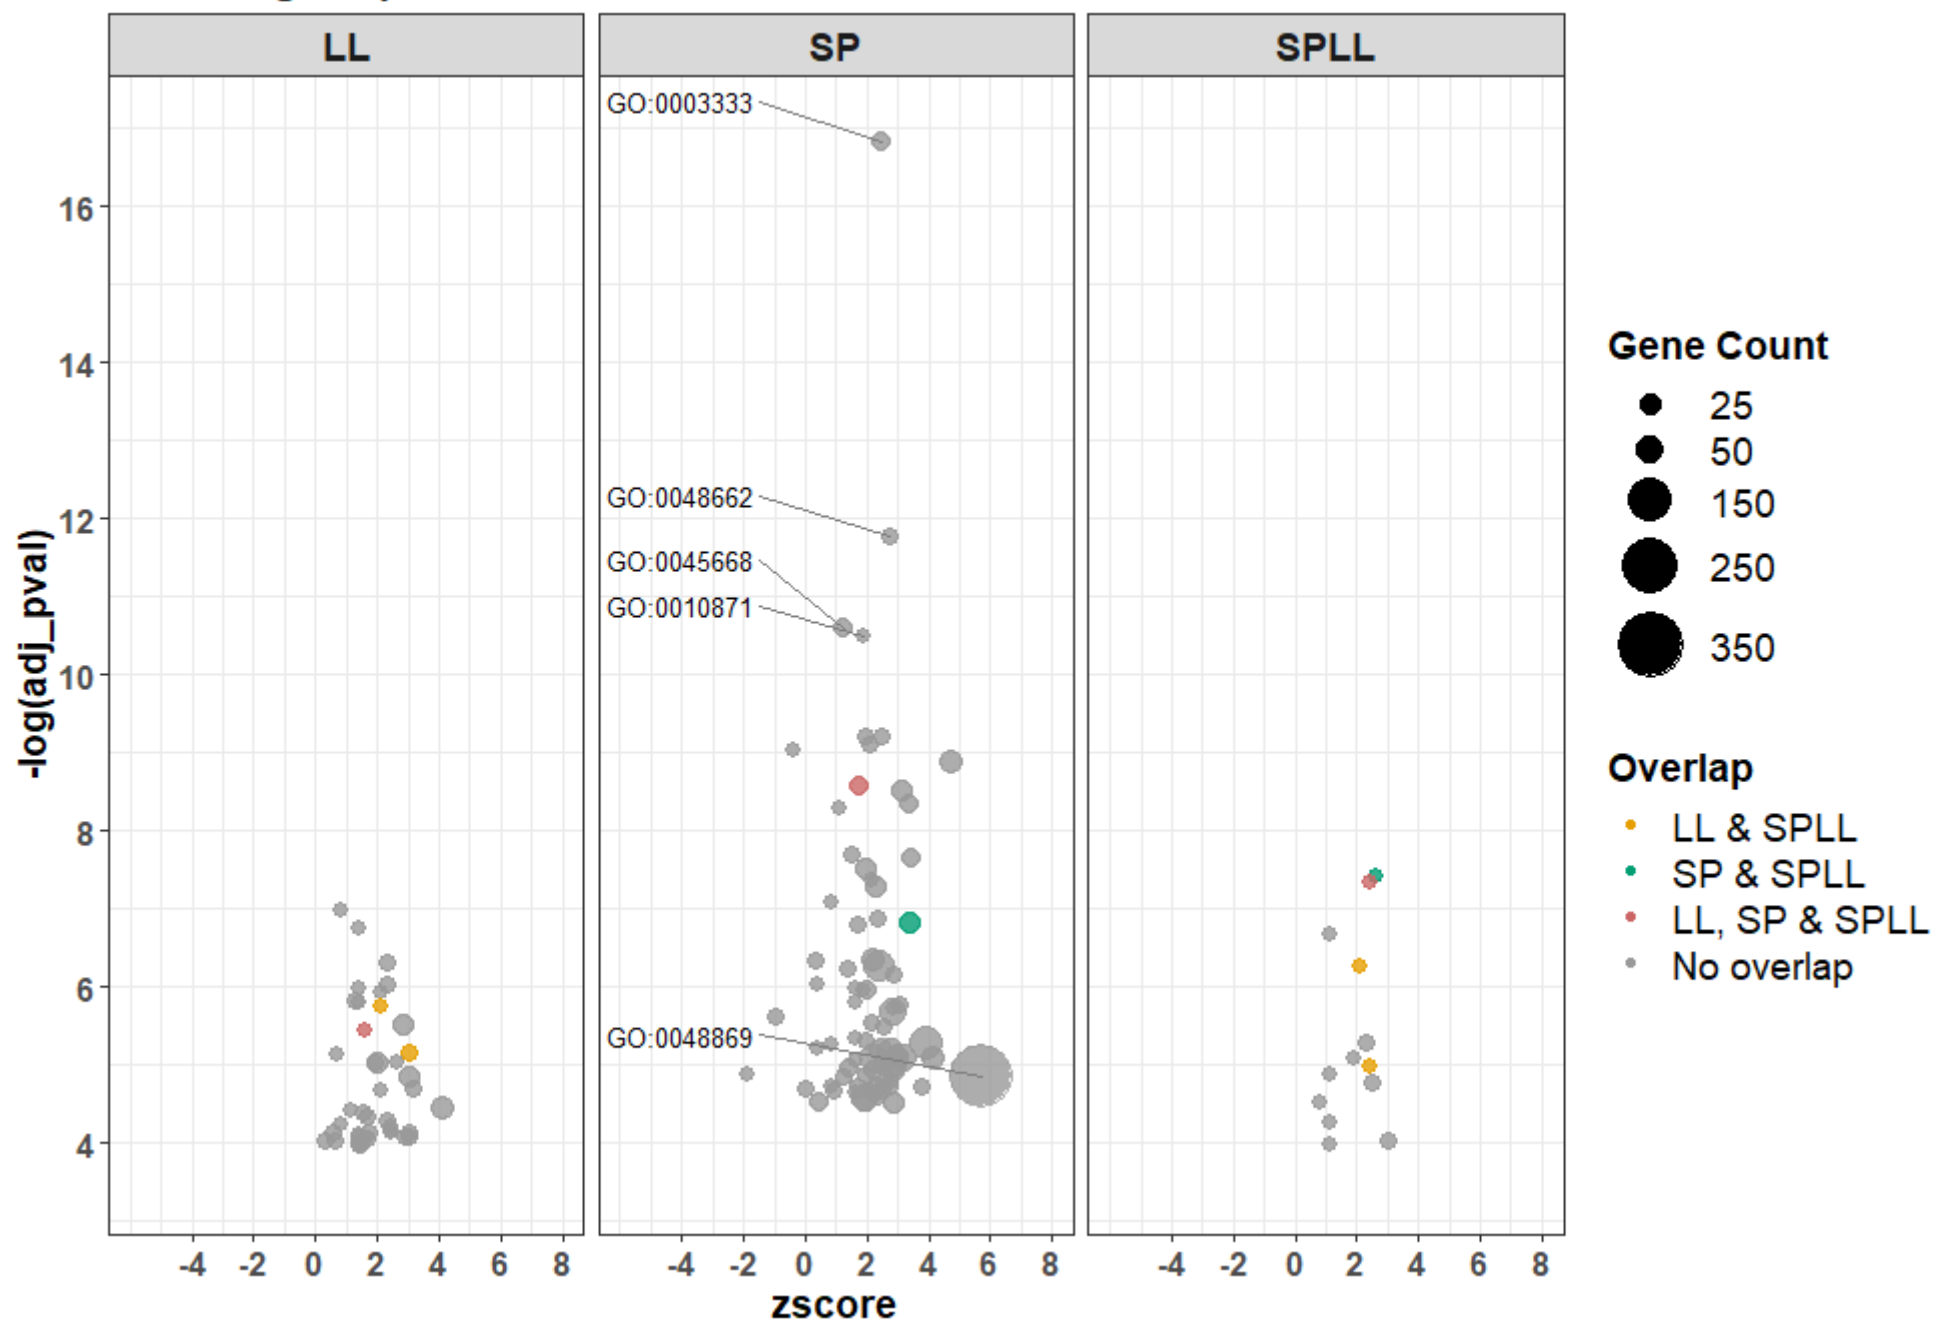

# T5 Cellular component

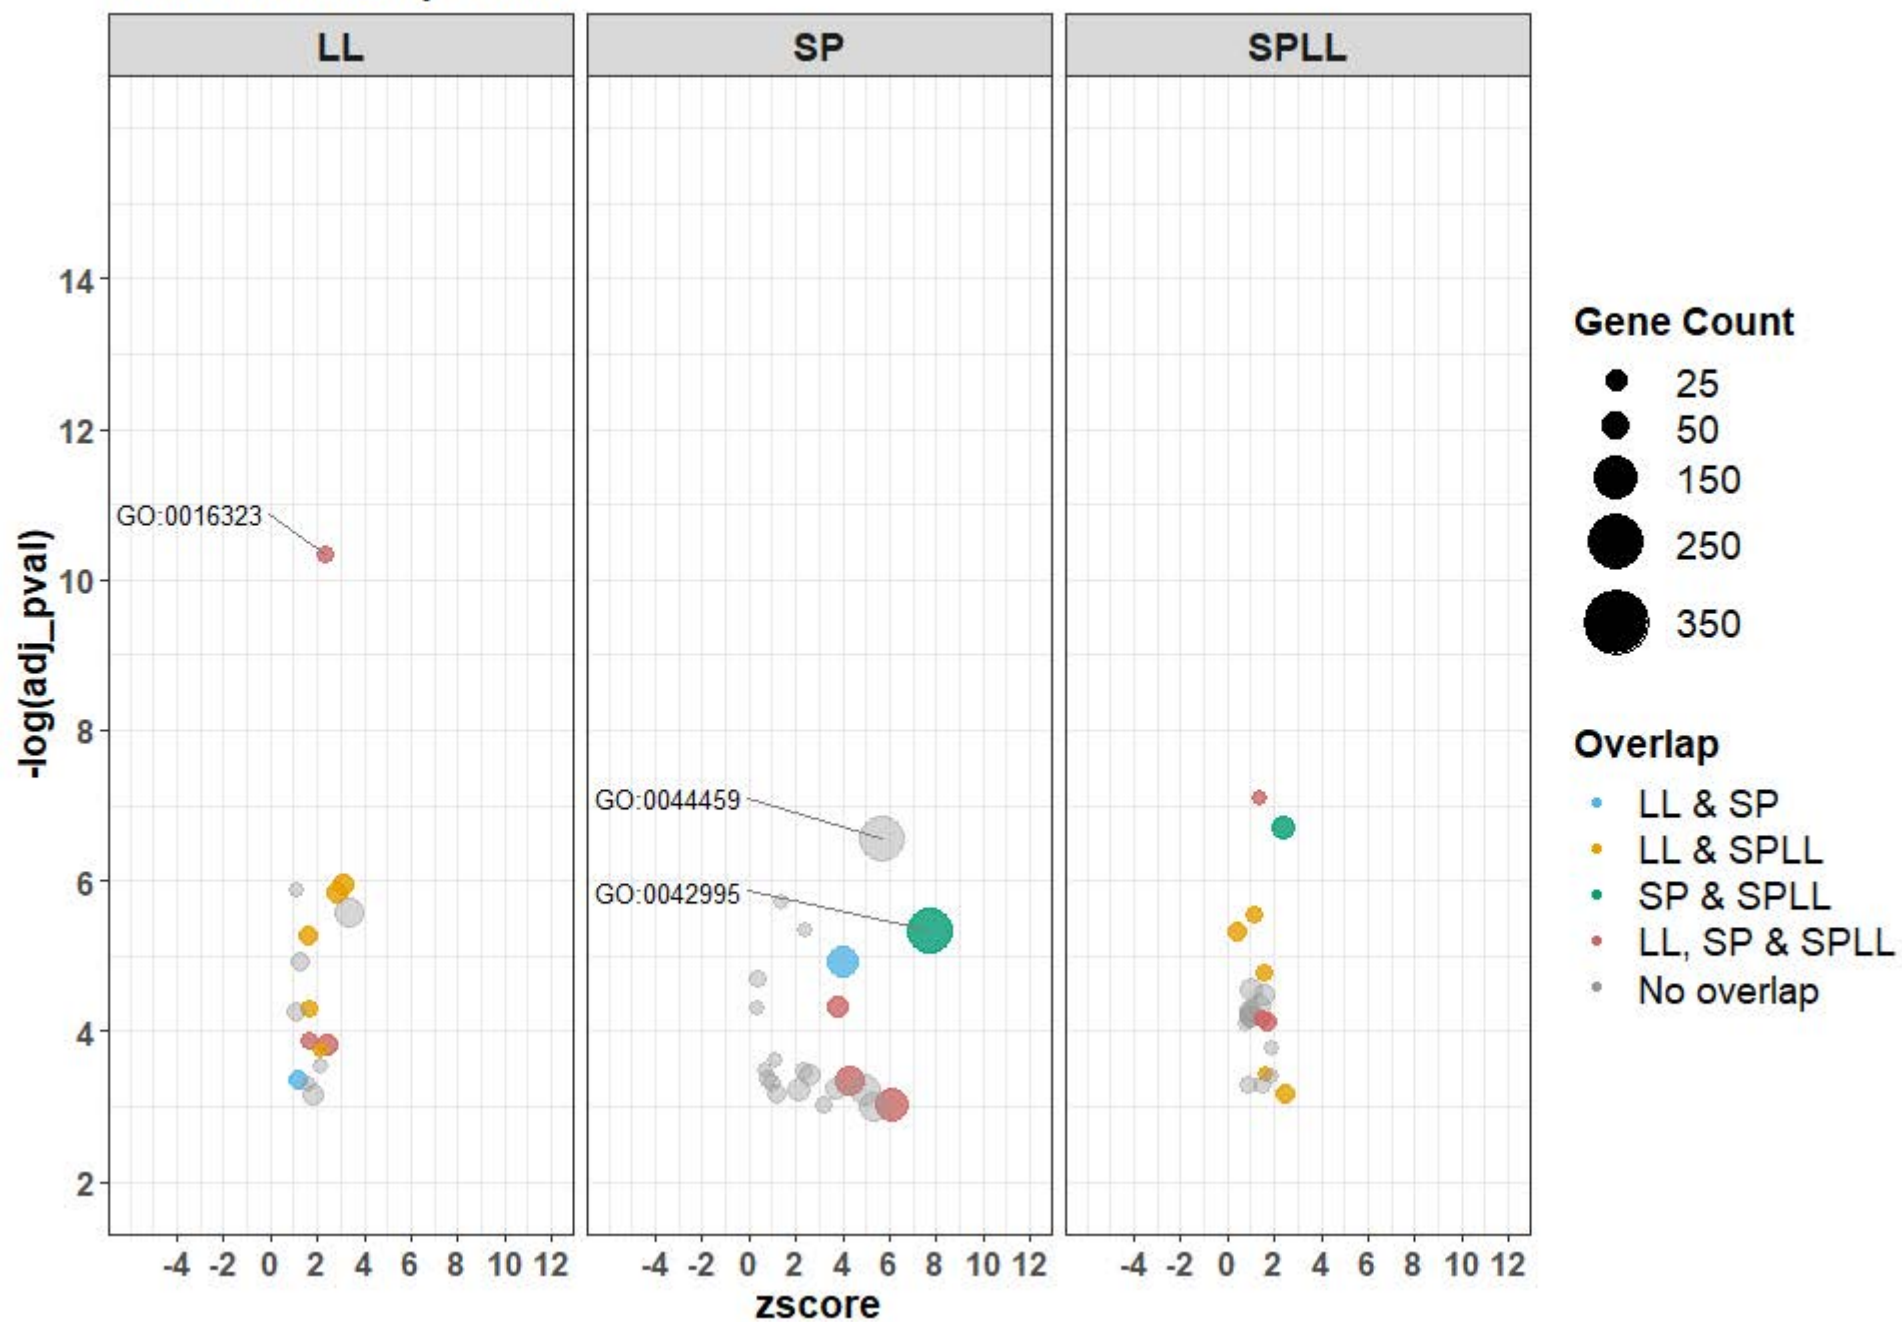

# T5 Molecular function

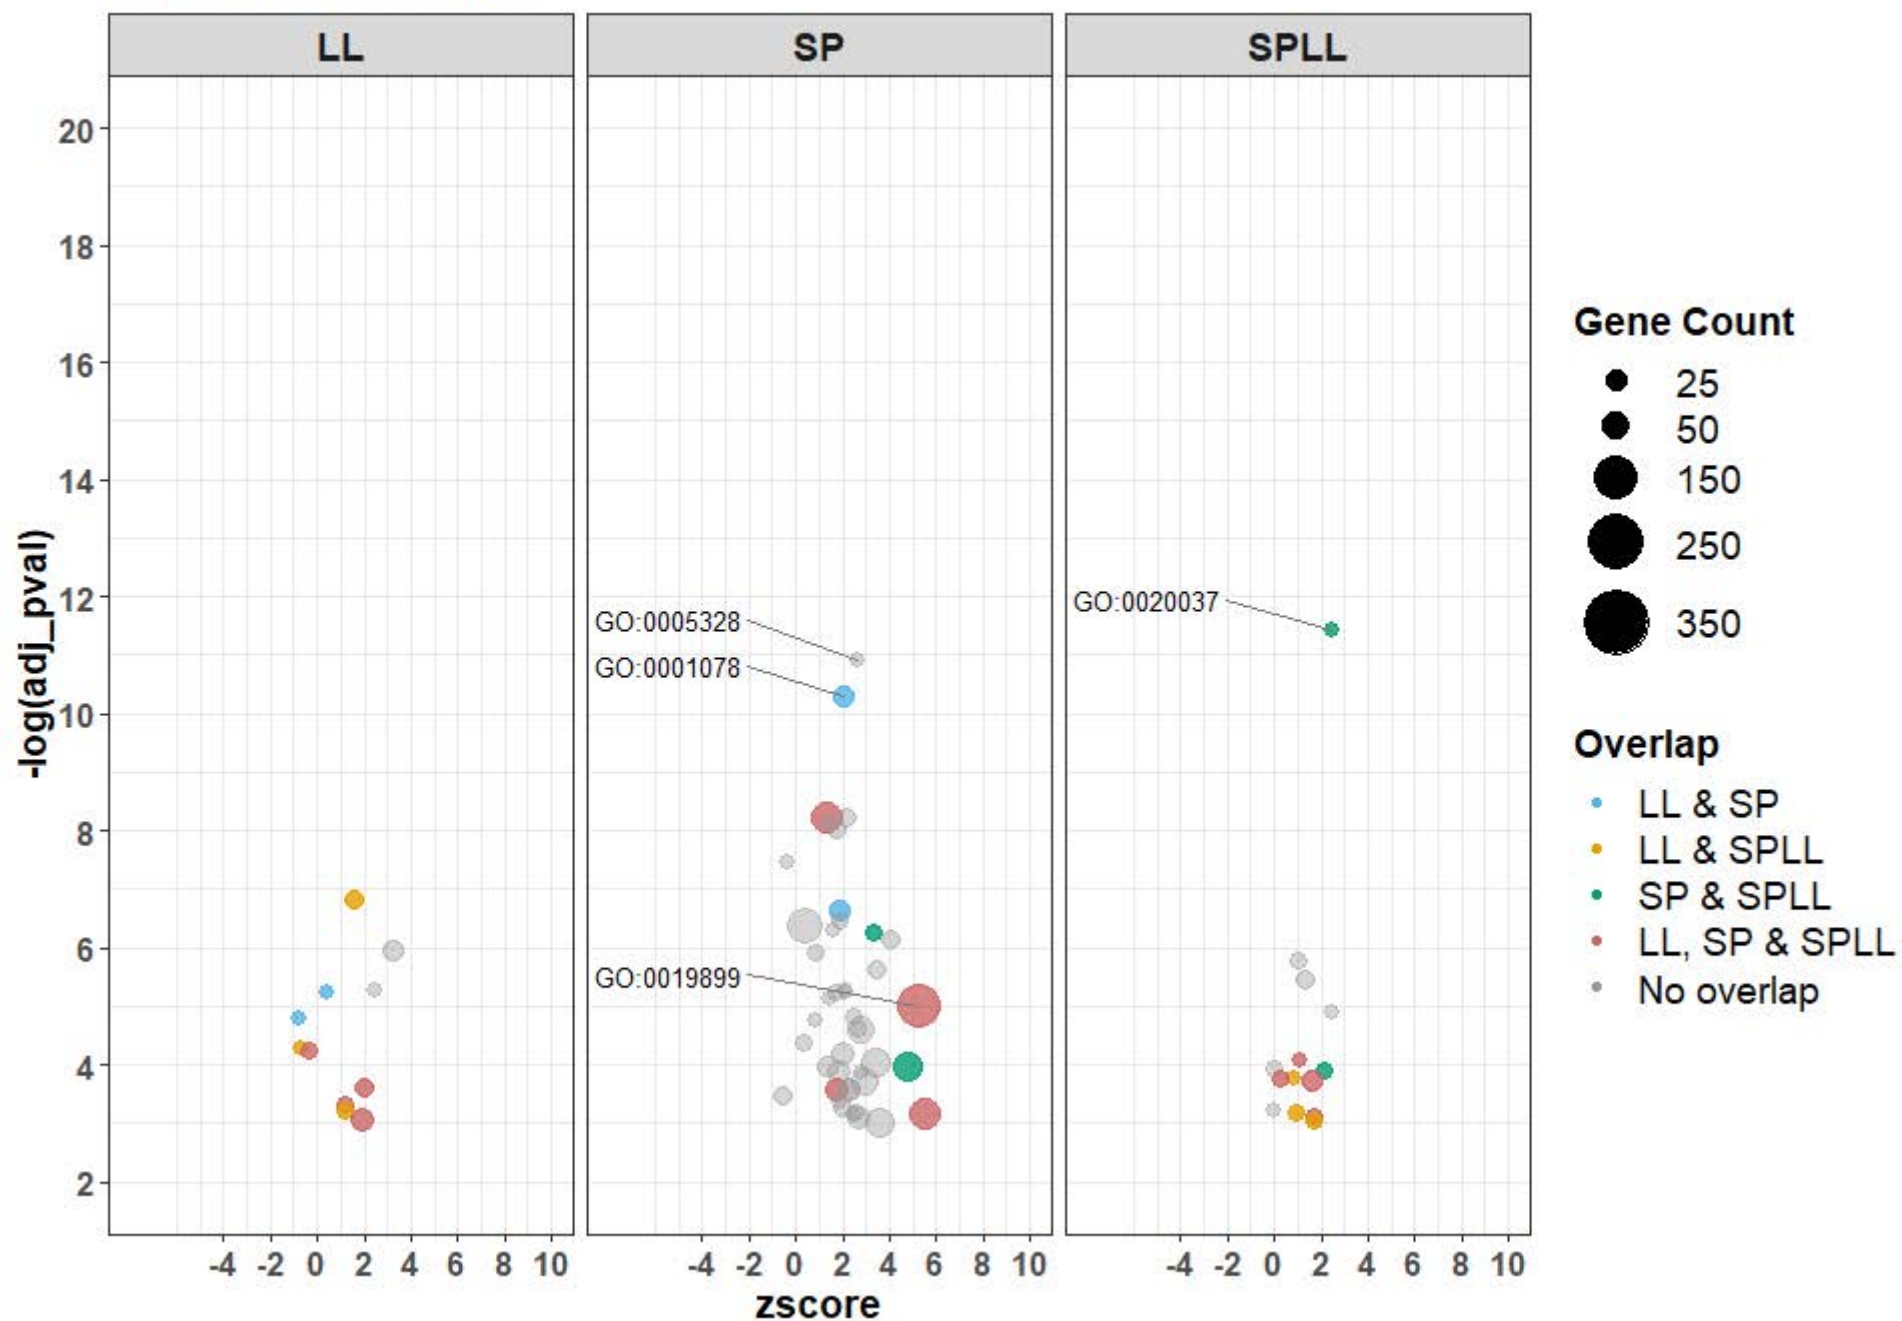



# T6 Cellular component

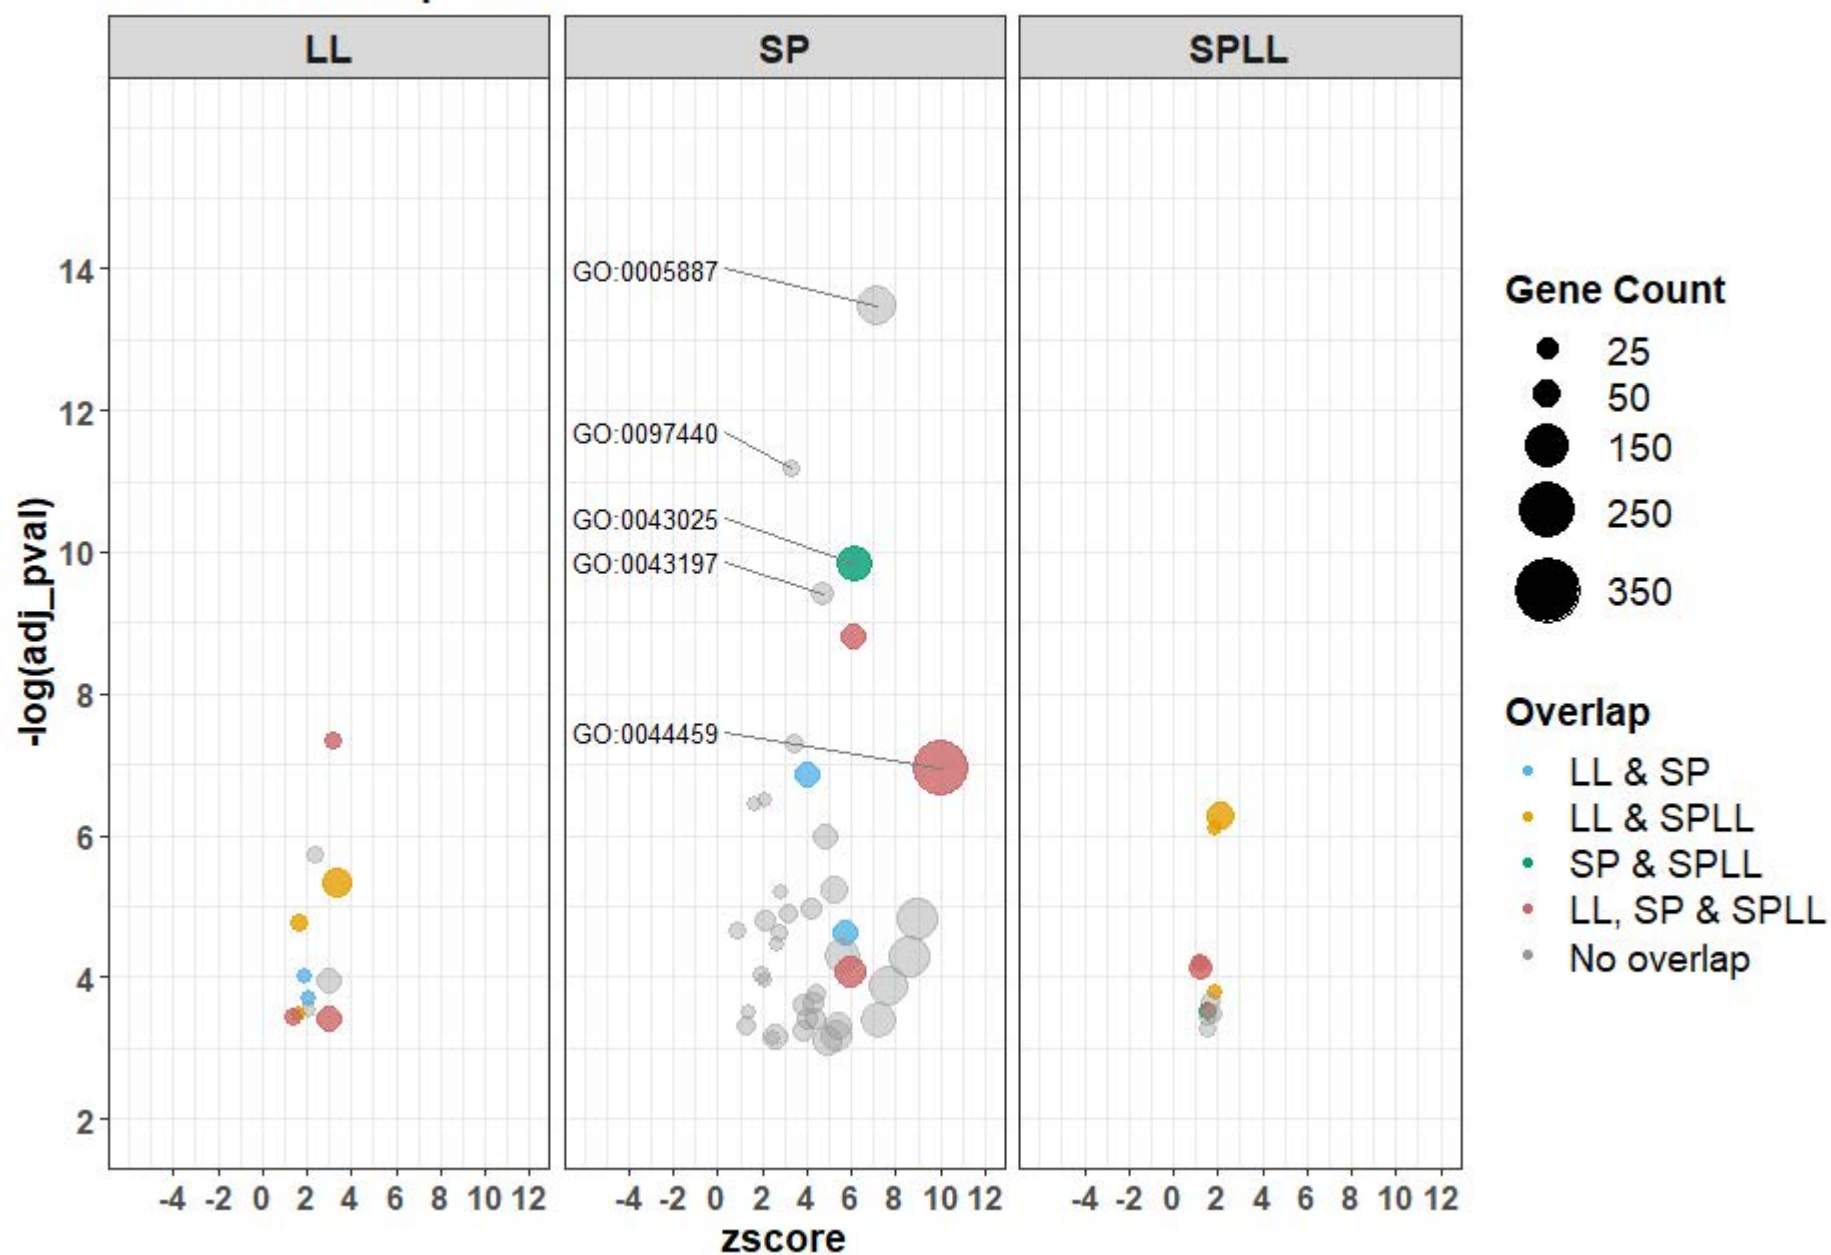

# T6 Molecular function

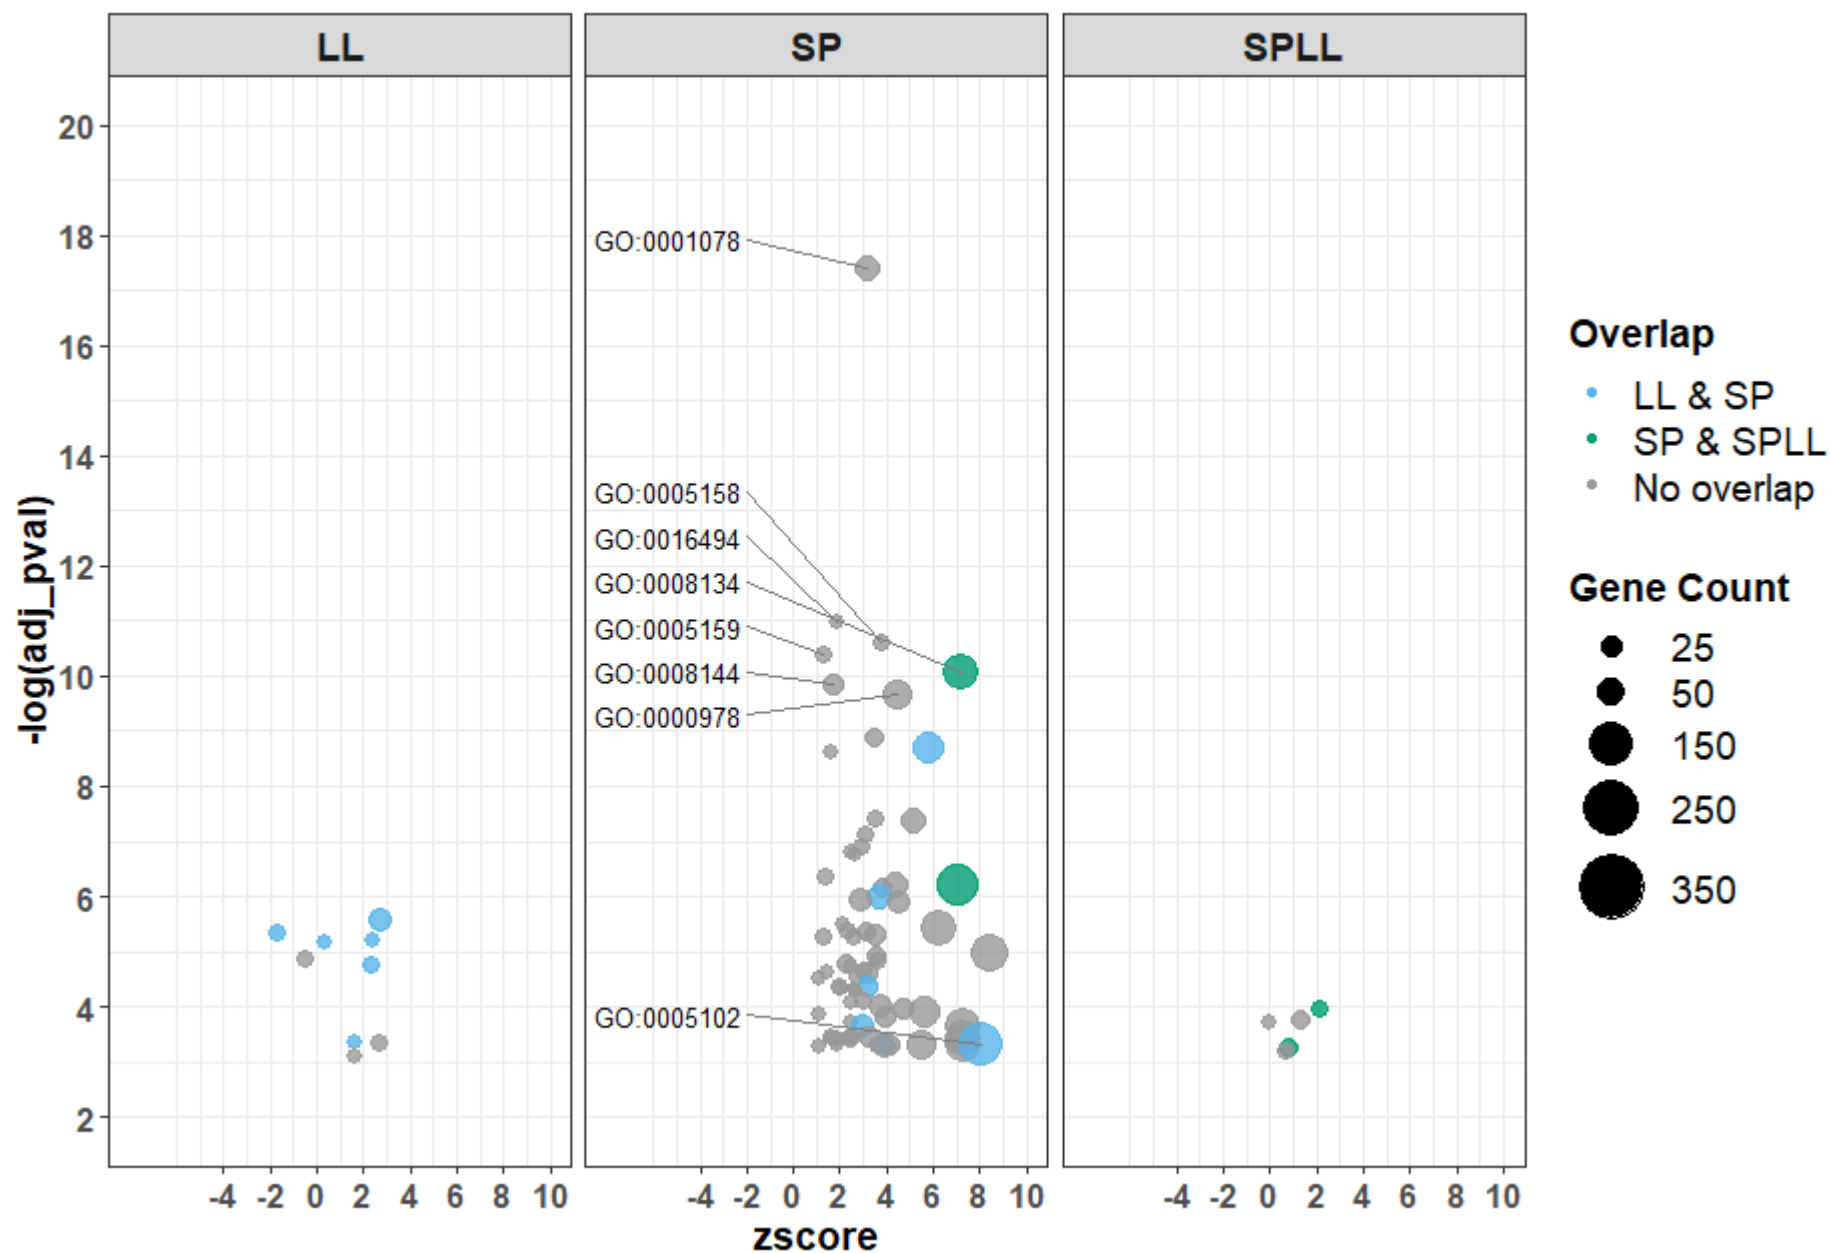

Supplement: Supplementary file 1 [file 1]
