# Supplementary material
Source: publisher figshare collection journal article supplement (https://gsajournals.figshare.com/articles/dataset/_/12017100)

gene42360:106581096

ATP-sensitive inward rectifier potassium channel 1-like

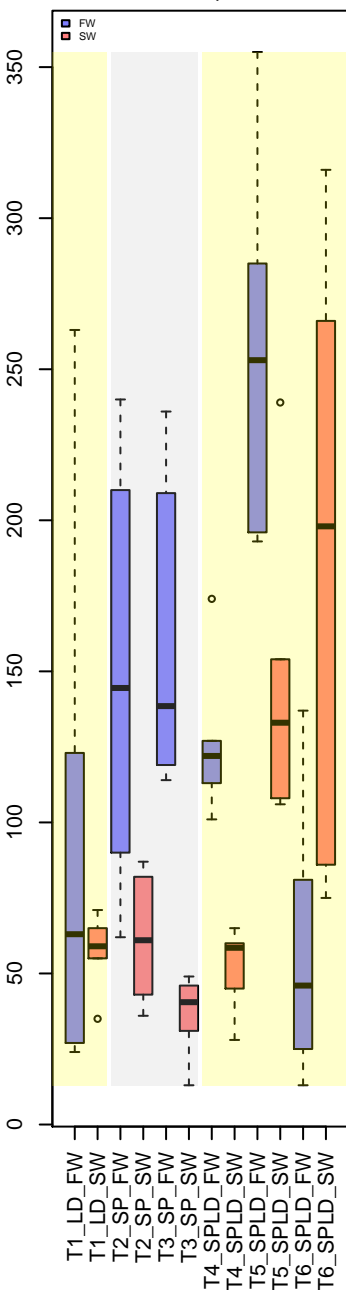

gene42360:106581096

ATP-sensitive inward rectifier potassium channel 1-like

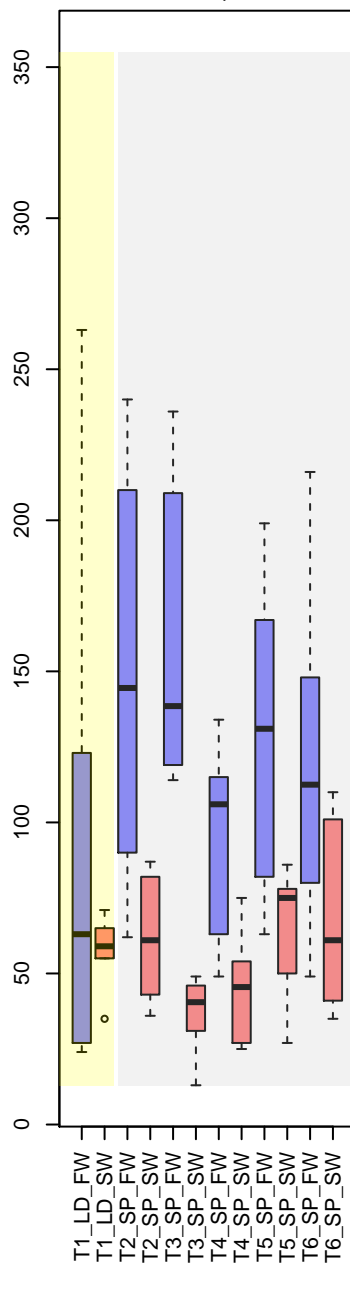

gene42360:106581096

ATP-sensitive inward rectifier potassium channel 1-like

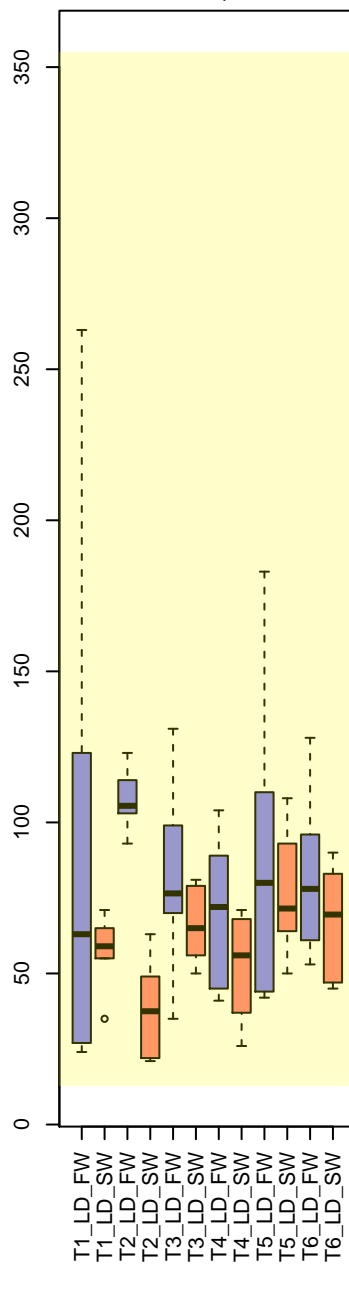

gene3816:106578513  
G protein-activated inward rectifier potassium channel 4-like

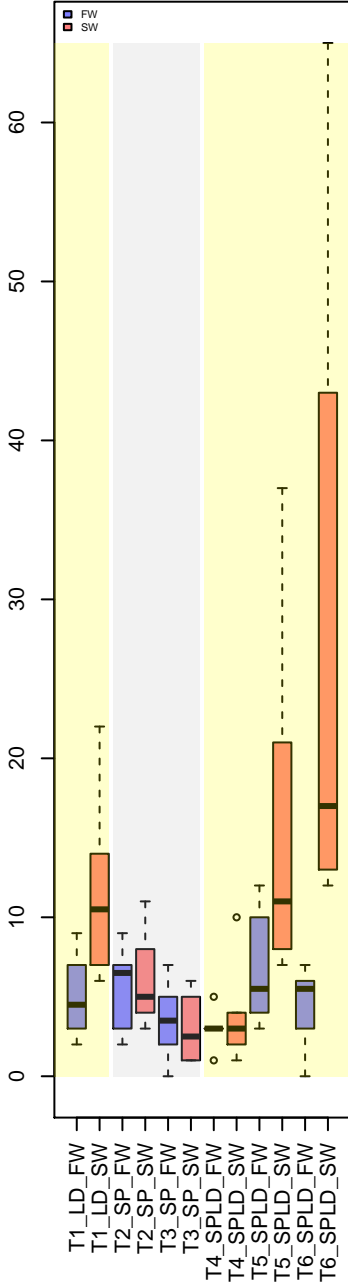

gene3816:106578513  
G protein-activated inward rectifier potassium channel 4-like

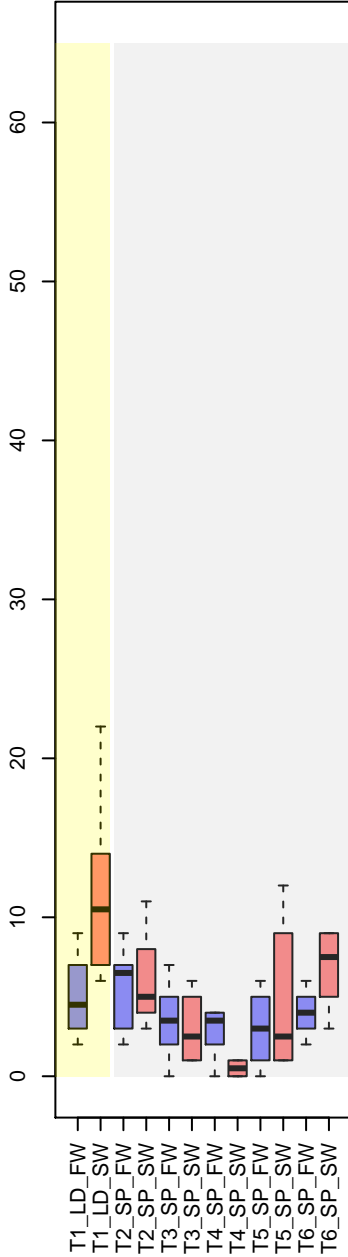

gene3816:106578513  
G protein-activated inward rectifier potassium channel 4-like

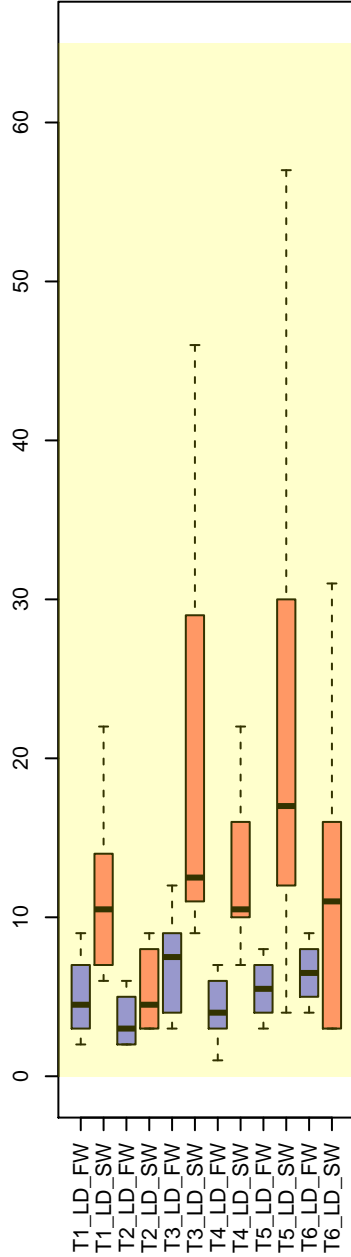

gene6804:106600484

junctional protein associated with coronary artery disease homol

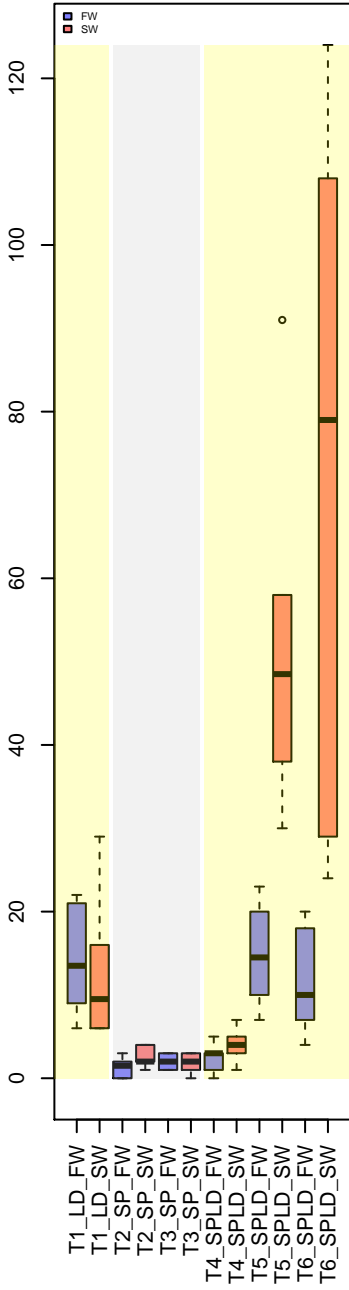

gene6804:106600484

junctional protein associated with coronary artery disease homol

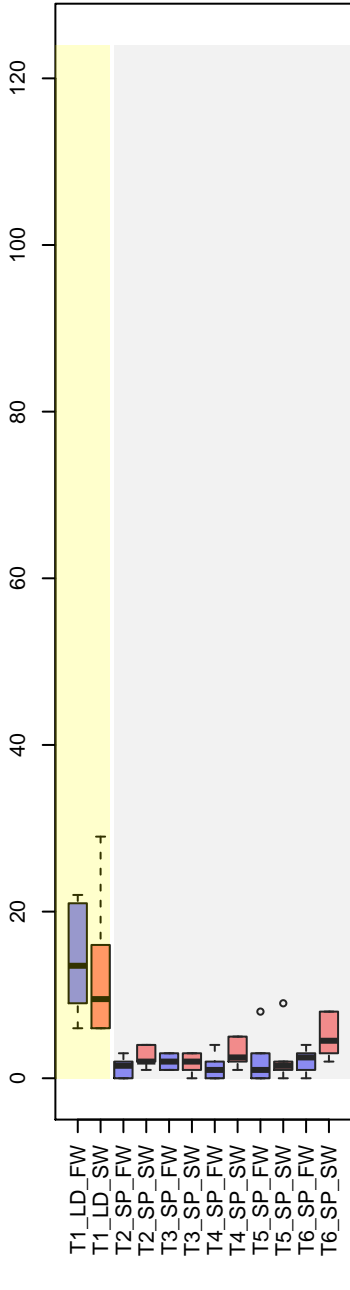

gene6804:106600484

junctional protein associated with coronary artery disease homol

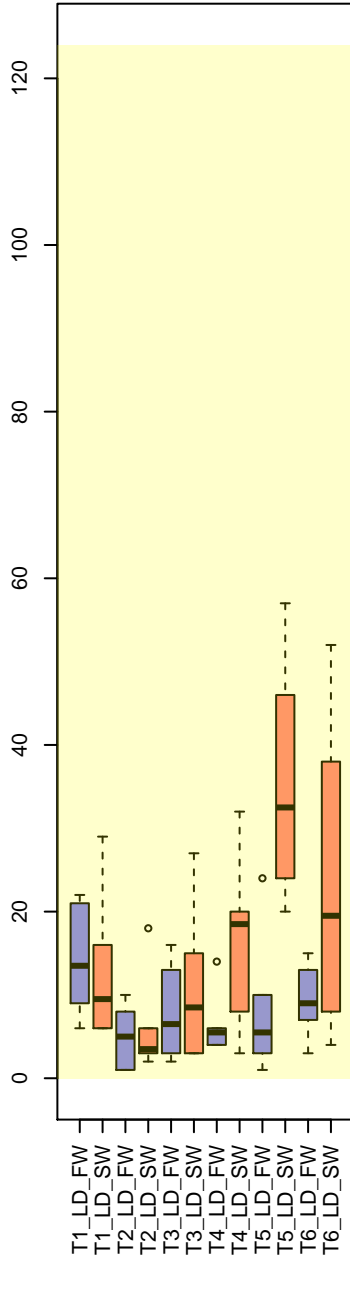

Supplement: Supplementary file 2 [file 1]
